# Supplementary material for: Small phytoplankton contribution to the total primary production in the Amundsen Sea
Source: Copernicus journal article supplement (doi:10.5194/bg-2016-453), 2016-10-24
Supplement: Supplementary file [file bg-2016-453-AC1-supplement.pdf]

1           **Small phytoplankton contribution to the total primary production in**  
2                                                           **the Amundsen Sea**

3  
4           **Sang H. Lee<sup>1</sup>, Bo Kyung Kim<sup>1</sup>, Yu Jeong Lim<sup>1</sup>, HuiTae Joo<sup>1</sup>, Jae Joon Kang<sup>1</sup>, Dabin**  
5                                                           **Lee<sup>1</sup>, Jisoo Park<sup>2</sup>, Sun-Yong Ha<sup>2</sup> and Sang Hoon Lee<sup>2</sup>**

6  
7                                                           <sup>1</sup>Department of Oceanography,  
8           Pusan National University, Geumjeong-gu, Busan 609-735, Korea

9                                                           TEL:82-51-510-2256   FAX:82-51-581-2963

10                                                           e-mail: [sanglee@pnu.ac.kr](mailto:sanglee@pnu.ac.kr)

11  
12                                                           <sup>2</sup>Korea Polar Research Institute

13                                                           Incheon 406-840, Korea  
14  
15  
16

## 17 Abstract

18 Small-sized phytoplankton is anticipated to be more important for phytoplankton community in  
19 a recent changing ocean condition. However, little information on the contribution of small-sized  
20 phytoplankton to overall phytoplankton production is currently available in the Amundsen Sea. To  
21 determine the contributions of small-sized phytoplankton to total biomass and primary production, carbon  
22 and nitrogen uptake rates of total and small-sized phytoplankton were obtained from 12 productivity  
23 stations in the Amundsen Sea. The daily carbon uptake rates of total phytoplankton averaged in this study  
24 were  $0.42 \text{ g C m}^{-2} \text{ d}^{-1}$  (S.D. =  $\pm 0.30 \text{ g C m}^{-2} \text{ d}^{-1}$ ) and  $0.84 \text{ g C m}^{-2} \text{ d}^{-1}$  (S.D. =  $\pm 0.18 \text{ g C m}^{-2} \text{ d}^{-1}$ ) whereas  
25 the daily total nitrogen (nitrate and ammonium) uptake rates were  $0.12 \text{ g N m}^{-2} \text{ d}^{-1}$  (S.D. =  $\pm 0.09 \text{ g N m}^{-2}$   
26  $\text{d}^{-1}$ ) and  $0.21 \text{ g N m}^{-2} \text{ d}^{-1}$  (S.D. =  $\pm 0.11 \text{ g N m}^{-2} \text{ d}^{-1}$ ), respectively for non-polynya and polynya regions,  
27 which were within the ranges reported previously. Small phytoplankton contributed 26.9 % and 27.7 % to  
28 the total carbon and nitrogen uptake rates of phytoplankton in this study, respectively, which were  
29 relatively higher than the chlorophyll-a contribution (19.4 %) of small phytoplankton. For a comparison  
30 of different regions, the contributions for chlorophyll-a concentration and primary production of small  
31 phytoplankton averaged from all the non-polynya stations were 42.4 % and 50.8 %, which were  
32 significantly higher than those (7.9 % and 14.9 %, respectively) in polynya region. A strong negative  
33 correlation ( $r^2 = 0.790$ ,  $p < 0.05$ ) was found between the contributions of small phytoplankton and the  
34 total daily primary production of phytoplankton in this study. This finding implies that daily primary  
35 production decreases as small phytoplankton contribution increases, which is mainly due to the lower  
36 carbon uptake rate of small phytoplankton than large phytoplankton. Under ongoing environmental  
37 changes caused by global warming, a potential decrease of total primary production would be led by  
38 increasing contribution of small phytoplankton in the Amundsen Sea.

39

40

41 Keywords: Phytoplankton, Primary production, Polynya, Amundsen Sea

42

## 43 **1. Introduction**

44           The Amundsen Sea is located in the West Antarctica between the Ross Sea and Bellingshausen  
45 Sea, which is one of the least-biologically studied regions in the Southern Ocean. Recently several  
46 international research programs (KOPRI Amundsen project, iSTAR, ASPIRE, and DynaLiFe) were  
47 launched to understand this remote area. Field-measurement data revealed that annual primary production  
48 of phytoplankton reaching to  $220 \text{ g C m}^{-2} \text{ y}^{-1}$  in the Amundsen Sea polynya is as high as that of Ross Sea  
49 polynya ( $200 \text{ g C m}^{-2} \text{ y}^{-1}$ ) which was previously known for the highest productivity region in the Southern  
50 Ocean (Lee et al., 2012). Given the fact that the chl-*a* concentration averaged from all the chl-*a* measured  
51 stations was twice higher than that of the only productivity-measured stations, Lee et al., (2012) argued  
52 that the annual production in the Amundsen Sea polynya could be even two-fold higher than that of Ross  
53 Sea polynya.

54           Over the past several decades a rapid climate change has been detected and subsequently  
55 physical changes have occurred in the marine ecosystem in the western Antarctic Peninsula (WAP)  
56 (Rückamp et al. 2011; Ducklow et al. 2007). Recent studies revealed that the Thwaites Glacier in Pine  
57 Island Bay is retreating fast and the ice volume loss in the nearby Getz Ice shelf is accelerating (Joughin  
58 et al., 2014; Paolo et al., 2015). Shoaling warm Circumpolar Deep Water is believed to be a main reason  
59 for the ice sheet mass loss largely caused by ice shelf basal melt underside of the ice shelves (Yager et al.  
60 2012; Schmidtko et al. 2014). The climate change from a cold-dry polar-type to a warm-humid sub-  
61 Antarctic-type drives subsequent changes in ocean biological productivity along the WAP shelf over the  
62 recent three decades (Montes-Hugo et al. 2009).

63           Phytoplankton as the base of oceanic food webs can be an indicator for changes in marine  
64 ecosystems responding to current climate changes (Moline et al., 2004; Wassman et al., 2011; Arrigo et  
65 al., 2015). In an expecting warmer ocean condition, small-sized phytoplankton is anticipated to contribute  
66 more to total phytoplankton community and thus marine ecosystems (Morán et al., 2010; Li et al., 2009;  
67 Lee et al., 2013). In consistent, Li et al. (2009) found increasing small-sized phytoplankton in the Canada  
68 Basin in the Arctic Ocean under freshening surface waters which results in a stronger stratification and

69 lower nutrient supply in the upper water column. Moreover, in the Antarctic Ocean, Moline et al. (2004)  
70 found a consistent transition from large diatoms to small cryptophytes associated with glacial melt water  
71 in the coastal waters along the Antarctic Peninsula in response to a regional warming trend. This change  
72 in dominant phytoplankton community from large to small cells will likely cause further alteration of  
73 higher trophic levels and subsequent food web (Moline et al., 2004). However, little information on the  
74 contribution of small-sized phytoplankton to primary production is available in the Antarctic Ocean  
75 (Saggiomo et al. 1998), especially in the Amundsen Sea with a rapid melting of ice shelf (Yager et al.  
76 2012; Schmidtko et al. 2014). Thus, the main objective in this study is to determine what extend small-  
77 sized phytoplankton contributes to overall total biomass and primary production in the Amundsen Sea to  
78 lay the groundwork for the future monitoring of marine ecosystem change responding to ongoing changes  
79 in environmental conditions.

80

## 81 **2. Materials and methods**

### 82 *2.1. Samplings*

83 Water samples were collected for carbon and nitrogen uptake measurements of phytoplankton in  
84 the Amundsen Sea during the KOPRI Amundsen cruise from 1 to 15 January, 2014 onboard the Korean  
85 Research Icebreaker ship *Araon*. Using a dual stable isotope technique (Lee et al., 2012; Kim et al., 2015),  
86 the experiments of carbon and nitrogen uptake rates of phytoplankton were conducted at 12 selected  
87 productivity stations including 2 revisited-stations (St. 3-1 and St. 19-1) when on-deck incubations were  
88 available during daytime at oceanographic survey stations. Based on sea ice concentration data from  
89 National Snow & Ice Data Center during the cruise period (Fig. 1), our study region was further separated  
90 into polynya and non-polynya areas for comparison based on sea ice distribution and concentration during  
91 the cruise period. Four stations (St. 1, St. 2, St. 3, and St. 3-1) among the 12 stations were belong to non-  
92 polynya region and the rest of the stations were belong to polynya region.

93 After 6 light depths (100, 50, 30, 12, 5, and 1% penetration of the surface irradiance, PAR) were  
94 determined with an LI-COR underwater  $4\pi$  light sensor, water samples for the uptake experiments as

95 well as biological and chemical property analysis were obtained from a CTD-rosette sampler system  
96 equipped with 24 10-L Niskin bottles.

### 97 *2.2. Total and size-fractionated chlorophyll-a concentration*

98 Water samples for total and size-fractionated chlorophyll-a concentrations of phytoplankton were  
99 obtained at the 12 productivity stations. Total chlorophyll-a concentrations were measured at six different  
100 light depths (100, 50, 30, 12, 5 and 1% of PAR). For size-fractionated chlorophyll-a concentrations, water  
101 samples were collected at three light depths (100, 30, and 1 %). Water samples (0.3–0.5 L) for total  
102 chlorophyll-a concentrations were filtered using Whatman glass fiber filters (GF/F; 25 mm). For different  
103 size-fractionated chlorophyll-a concentrations water samples (0.7–1 L) were passed sequentially through  
104 20 and 5  $\mu\text{m}$  Nucleopore filters (47 mm) and 0.7  $\mu\text{m}$  GF/F filters (47 mm). After the filters were extracted  
105 using the method described by Kim et al. (2015), all chlorophyll-a concentrations were subsequently  
106 determined onboard using a Trilogy fluorometer (Turner Designs, USA). The methods and calculations  
107 for chlorophyll-a were based on Parsons et al. (1984).

### 108 *2.3. Carbon and nitrogen uptake experiments*

109 Carbon and nitrogen uptake experiments of phytoplankton were executed by a  $^{13}\text{C}$ - $^{15}\text{N}$  dual  
110 isotope tracer technique previously applied for the Amundsen Sea (Lee et al. 2012; Kim et al. 2015). In  
111 this study, basically we followed same procedure of Lee et al. (2012). In brief, six light depths (100, 50,  
112 30, 12, 5, and 1%) were determined with an LI-COR underwater  $4\pi$  light sensor (LI-COR Inc., Lincoln,  
113 Nebraska, USA) lowered with CTD/rosette sampler. Water sample from each light depth was transferred  
114 into different screened polycarbonate incubation bottle (1 L) which matches with each light depth. The  
115 productivity bottles were incubated in large polycarbonate material incubators cooled with running  
116 surface seawater on deck under natural light conditions, after the water samples were inoculated with  
117 labeled carbon ( $\text{NaH}^{13}\text{CO}_3$ ) and nitrate ( $\text{K}^{15}\text{NO}_3$ ) or ammonium ( $^{15}\text{NH}_4\text{Cl}$ ) substrates. After 4–5 h  
118 incubations, the incubated waters were well mixed and distributed into two filtration sets for the carbon  
119 and nitrogen uptake rates of total ( $> 0.7 \mu\text{m}$ ) and small-sized cells ( $< 5 \mu\text{m}$ ). The incubated waters (0.3 L)

120 for total uptake rates were filtered through pre-combusted GF/F filters (24 mm diameter), whereas waters  
121 samples (0.5 L) for the uptake rates of small-sized cells were passed through 5  $\mu\text{m}$  Nuclepore filters (47  
122 mm) to remove large-sized cells ( $> 5 \mu\text{m}$ ) and then the filtrate was passed through GF/F (24 mm) for the  
123 small-sized cells (Lee et al., 2013). The values for large phytoplankton in this study were obtained from  
124 the difference between small and total fractions (Lee et al., 2013). The filters were immediately preserved  
125 at  $-80^{\circ}\text{C}$  until mass spectrometric analysis. After acid fuming overnight to remove carbonate, the  
126 concentrations of particulate organic carbon (POC) and nitrogen (PON) and the abundance of  $^{13}\text{C}$  and  
127  $^{15}\text{N}$  were determined by a Finnigan Delta+XL mass spectrometer at the Alaska Stable Isotope Facility,  
128 USA.

129 All contribution results of small phytoplankton in this study were estimated from comparison of  
130 small phytoplankton to total phytoplankton integral values from 100 to 1 % light depth at each station  
131 based on the trapezoidal rule. Daily carbon and nitrogen uptake rates of phytoplankton were based on our  
132 hourly uptake rates measured in this study and a 24-h photoperiod per day during the summer period in  
133 the Amundsen Sea (Lee et al., 2012).

134

### 135 **3. Results**

#### 136 3.1. Chlorophyll-a, POC, and PON contributions of small phytoplankton

137 The total (large + small phytoplankton) chlorophyll-a concentration integrated from six different  
138 light depths ranged from 11.1 to 80.3  $\text{mg chl-a m}^{-2}$  (mean  $\pm$  S.D. =  $57.4 \pm 25.2 \text{ mg chl-a m}^{-2}$ ), whereas  
139 small ( $< 5 \mu\text{m}$ ) chlorophyll-a concentration ranged from 3.9 to 9.4  $\text{mg chl-a m}^{-2}$  (mean  $\pm$  S.D. =  $5.7 \pm 1.7$   
140  $\text{mg chl-a m}^{-2}$ ) in this study (Fig. 2). The average contribution of small phytoplankton to the total  
141 chlorophyll-a concentration was 19.4 % (S.D. =  $\pm 26.0$  %) ranging from 4.9 to 76.5 %. In the Amundsen  
142 Sea, large phytoplankton ( $> 5 \mu\text{m}$ ) were generally predominant (approximately 80 %) during the cruise  
143 period in 2014 based on different-sized chlorophyll-a concentrations. For a regional comparison, the  
144 average contributions of small phytoplankton to the total chlorophyll-a concentration were 42.4 % (S.D. =

145  $\pm 37.2$  %) and 7.9 % (S.D. =  $\pm 3.5$  %) for non-polynya and polynya regions, respectively. The  
146 chlorophyll-a contribution of small phytoplankton was larger in the non-polynya stations than the polynya  
147 stations although they were not significantly different (t-test,  $p = 0.16$ ).

148 The total integral POC concentration of phytoplankton displayed no large spatial variation  
149 ranging from 4.72 to 9.22 mg C m<sup>-2</sup> (Fig. 3). In comparison, the total integral PON concentration of  
150 phytoplankton ranged from 0.76 to 1.74 mg C m<sup>-2</sup>. The POC contribution of small phytoplankton ranged  
151 from 30.7 to 65.5 % (mean  $\pm$  S.D. =  $41.1 \pm 10.6$  %), whereas the PON contribution ranged similarly from  
152 30.8 to 67.2 % (mean  $\pm$  S.D. =  $41.3 \pm 11.5$  %) in the Amundsen Sea (Fig. 3). Specifically, the POC and  
153 PON contributions of small phytoplankton averaged from all the polynya stations were 36.9 % (S.D. =  $\pm$   
154 4.6 %) and 37.0 % (S.D. =  $\pm 6.9$  %), respectively. In comparison, the POC and PON contributions of  
155 small phytoplankton averaged from the non-polynya stations were 49.5 % (S.D. =  $\pm 14.4$  %) and 50.0 %  
156 (S.D. =  $\pm 15.1$  %), respectively.

### 157 3.2. Carbon uptake rate contributions of small phytoplankton

158 The total daily carbon uptake rates of phytoplankton (large + small phytoplankton) integrated  
159 from six different light depths ranged from 150.4 to 1213.4 mg C m<sup>-2</sup> d<sup>-1</sup> with an average of 696.5 mg C  
160 m<sup>-2</sup> d<sup>-1</sup> (S.D. =  $\pm 298.4$  mg C m<sup>-2</sup> d<sup>-1</sup>) in this study (Fig. 4). In contrast, the rates of small phytoplankton  
161 ranged between 58.6 and 266.4 mg C m<sup>-2</sup> d<sup>-1</sup> with an average of 124.9 mg C m<sup>-2</sup> d<sup>-1</sup> (S.D. =  $\pm 62.4$  mg C  
162 m<sup>-2</sup> d<sup>-1</sup>). Small phytoplankton contributed 26.9 % (S.D. =  $\pm 29.3$ %) to total daily carbon uptake rate of  
163 total phytoplankton.

164 Specifically, the total daily carbon uptake rates of phytoplankton ranged from 150.4 to 796.4 mg  
165 C m<sup>-2</sup> d<sup>-1</sup> with an average of 415.0 mg C m<sup>-2</sup> d<sup>-1</sup> (S.D. =  $\pm 298.2$  mg C m<sup>-2</sup> d<sup>-1</sup>) in non-polynya region,  
166 whereas they ranged from 654.8 to 1213.4 mg C m<sup>-2</sup> d<sup>-1</sup> with an average of 837.3 mg C m<sup>-2</sup> d<sup>-1</sup> (S.D. =  $\pm$   
167 184.1 mg C m<sup>-2</sup> d<sup>-1</sup>) in polynya region. The total daily carbon uptake rates of phytoplankton were  
168 significantly higher (t-test,  $p < 0.05$ ) in polynya stations than non-polynya stations. The rates of small  
169 phytoplankton ranged between 58.6 and 193.6 mg C m<sup>-2</sup> d<sup>-1</sup> with an average of 126.5 mg C m<sup>-2</sup> d<sup>-1</sup> (S.D. =  
170  $\pm 55.2$  mg C m<sup>-2</sup> d<sup>-1</sup>) in non-polynya region, whereas they ranged from 62.2 to 266.4 mg C m<sup>-2</sup> d<sup>-1</sup> with an

171 average of  $124.1 \text{ mg C m}^{-2} \text{ d}^{-1}$  (S.D. =  $\pm 69.3 \text{ mg C m}^{-2} \text{ d}^{-1}$ ) in polynya region. The daily carbon uptake  
172 rates of small phytoplankton were not significantly different (t-test,  $p > 0.05$ ) between polynya and non-  
173 polynya stations. The average contributions of small phytoplankton to total daily carbon uptake rates were  
174 50.8 % (S.D. =  $\pm 42.8 \%$ ) and 14.9 % (S.D. =  $\pm 8.4 \%$ ), respectively for non-polynya and polynya regions.  
175 The average contributions were largely different between polynya and non-polynya regions but they were  
176 not statistically significant (t-test,  $p > 0.05$ ).

### 177 3.3. Nitrogen uptake rate contributions of small phytoplankton

178 The total daily nitrate uptake rates of phytoplankton (large + small phytoplankton) ranged from  
179 34.0 to  $174.2 \text{ mg N m}^{-2} \text{ d}^{-1}$  with an average of  $93.7 \text{ mg N m}^{-2} \text{ d}^{-1}$  (S.D. =  $\pm 43.2 \text{ mg N m}^{-2} \text{ d}^{-1}$ ), whereas the  
180 rates of small phytoplankton ranged from 6.1 to  $40.9 \text{ mg N m}^{-2} \text{ d}^{-1}$  with an average of  $19.0 \text{ mg N m}^{-2} \text{ d}^{-1}$   
181 (S.D. =  $\pm 11.3 \text{ mg N m}^{-2} \text{ d}^{-1}$ ) in this study (Fig. 5). Small phytoplankton contributed 21.5 % (S.D. =  $\pm$   
182 11.1 %) to total daily nitrate uptake rates. In comparison, the total daily ammonium uptake rates of  
183 phytoplankton ranged from 12.4 to  $173.8 \text{ mg N m}^{-2} \text{ d}^{-1}$  with an average of  $86.7 \text{ mg N m}^{-2} \text{ d}^{-1}$  (S.D. =  $\pm$   
184  $75.9 \text{ mg N m}^{-2} \text{ d}^{-1}$ ), whereas the rates of small phytoplankton ranged from 9.1 to  $81.1 \text{ mg N m}^{-2} \text{ d}^{-1}$  with  
185 an average of  $25.7 \text{ mg N m}^{-2} \text{ d}^{-1}$  (S.D. =  $\pm 21.1 \text{ mg N m}^{-2} \text{ d}^{-1}$ ) in this study (Fig. 6). Small phytoplankton  
186 contributed 38.7 % (S.D. =  $\pm 24.9 \%$ ) to total daily ammonium uptake rates. The contributions of small  
187 phytoplankton were significantly higher in ammonium uptake rate than nitrate uptake rate (t-test,  $p <$   
188 0.05).

189 Specifically for different regions, the total daily nitrate uptake rates of phytoplankton ranged from  
190 34.0 to  $142.1 \text{ mg N m}^{-2} \text{ d}^{-1}$  with an average of  $71.9 \text{ mg N m}^{-2} \text{ d}^{-1}$  (S.D. =  $\pm 48.4 \text{ mg N m}^{-2} \text{ d}^{-1}$ ) in non-  
191 polynya region whereas they ranged from 44.2 to  $174.2 \text{ mg N m}^{-2} \text{ d}^{-1}$  with an average of  $104.6 \text{ mg N m}^{-2}$   
192  $\text{d}^{-1}$  (S.D. =  $\pm 39.0 \text{ mg N m}^{-2} \text{ d}^{-1}$ ) in polynya region, respectively. In comparison, the daily nitrate uptake  
193 rates of small phytoplankton ranged from 7.5 to  $26.6 \text{ mg N m}^{-2} \text{ d}^{-1}$  with an average of  $16.7 \text{ mg N m}^{-2} \text{ d}^{-1}$   
194 (S.D. =  $\pm 7.8 \text{ mg N m}^{-2} \text{ d}^{-1}$ ) and from 6.1 to  $40.9 \text{ mg N m}^{-2} \text{ d}^{-1}$  with an average of  $20.1 \text{ mg N m}^{-2} \text{ d}^{-1}$  (S.D.  
195 =  $\pm 13.1 \text{ mg N m}^{-2} \text{ d}^{-1}$ ), respectively for non-polynya and polynya regions. The contributions of small  
196 phytoplankton to the total daily nitrate uptake rates were 28.2 % (S.D. =  $\pm 15.9 \%$ ) in non-polynya region



197 and 18.1 % (S.D. =  $\pm$  6.8 %) in polynya region, respectively. The total daily ammonium uptake rates of  
198 total phytoplankton ranged between 12.3 and 106.1 mg N m<sup>-2</sup> d<sup>-1</sup> (mean  $\pm$  S.D. = 49.7  $\pm$  41.2 mg N m<sup>-2</sup> d<sup>-1</sup>)  
199 in non-polynya region and between 18.1 and 269.3 mg N m<sup>-2</sup> d<sup>-1</sup> (mean  $\pm$  S.D. = 105.2  $\pm$  84.6 mg N m<sup>-2</sup> d<sup>-1</sup>)  
200 in polynya region. In comparison, the rates of small phytoplankton ranged between 9.1 and 22.4 mg N  
201 m<sup>-2</sup> d<sup>-1</sup> (mean  $\pm$  S.D. = 15.8  $\pm$  6.4 mg N m<sup>-2</sup> d<sup>-1</sup>) in non-polynya region and between 9.9 and 81.1 mg N m<sup>-2</sup>  
202 d<sup>-1</sup> (mean  $\pm$  S.D. = 30.7  $\pm$  24.5 mg N m<sup>-2</sup> d<sup>-1</sup>) in polynya region. Small phytoplankton contributed 52.8 %  
203 (S.D. =  $\pm$  40.5 %) and 31.6 % (S.D. =  $\pm$  10.1 %) to the total daily ammonium uptake rates in non-polynya  
204 and polynya regions, respectively which were not significantly different (t-test, p = 0.37).

205 The total integral daily nitrogen uptake rate (nitrate + ammonium uptake rates) of phytoplankton  
206 ranged from 46.4 to 443.5 mg N m<sup>-2</sup> d<sup>-1</sup> (mean  $\pm$  S.D. = 180.4  $\pm$  106.7 mg N m<sup>-2</sup> d<sup>-1</sup>) in this study. For  
207 non-polynya and polynya regions, they ranged from 46.4 to 248.1 mg N m<sup>-2</sup> d<sup>-1</sup> (mean  $\pm$  S.D. = 121.6  $\pm$   
208 89.3 mg N m<sup>-2</sup> d<sup>-1</sup>) and from 91.7 to 443.5 mg N m<sup>-2</sup> d<sup>-1</sup> (mean  $\pm$  S.D. = 209.8  $\pm$  107.3 mg N m<sup>-2</sup> d<sup>-1</sup>),  
209 respectively. In comparison, the total integral daily nitrogen uptake rate of small phytoplankton ranged  
210 from 16.6 to 46.6 mg N m<sup>-2</sup> d<sup>-1</sup> (mean  $\pm$  S.D. = 32.5  $\pm$  13.2 mg N m<sup>-2</sup> d<sup>-1</sup>) and from 17.6 to 122.0 mg N m<sup>-2</sup>  
211 d<sup>-1</sup> (mean  $\pm$  S.D. = 50.8  $\pm$  32.4 mg N m<sup>-2</sup> d<sup>-1</sup>) for non-polynya and polynya regions, respectively. Small  
212 phytoplankton contributed 36.2 % (S.D. =  $\pm$  23.0 %) to the total integral daily nitrogen uptake rates in  
213 non-polynya region, whereas they contributed 23.5 % (S.D. =  $\pm$  6.0 %) for polynya region. The integral  
214 daily nitrogen uptake rates and contributions of small phytoplankton were not statistically different  
215 between non-polynya and polynya regions.

216

#### 217 **4. Discussion and conclusion**

218 The total daily carbon uptake rates of phytoplankton averaged for non-polynya and polynya  
219 regions were 0.42 g C m<sup>-2</sup> d<sup>-1</sup> (S.D. =  $\pm$  0.30 g C m<sup>-2</sup> d<sup>-1</sup>) and 0.84 g C m<sup>-2</sup> d<sup>-1</sup> (S.D. =  $\pm$  0.18 g C m<sup>-2</sup> d<sup>-1</sup>),  
220 respectively in this study. According to the previous reports in the Amundsen Sea (Lee et al., 2012; Kim  
221 et al., 2015), the total daily carbon uptake rates ranged from 0.2 to 0.12 g C m<sup>-2</sup> d<sup>-1</sup> in non-polynya region.  
222 Our rate (0.42 g C m<sup>-2</sup> d<sup>-1</sup>) in non-polynya region is somewhat higher than those reported previously but

223 they are not significantly different (t-test,  $p = 0.77$ ). In comparison, our total daily carbon uptake rate in  
 224 polynya region ( $0.84 \text{ g C m}^{-2} \text{ d}^{-1}$ ) is within the range between Lee et al. (2012;  $2.2 \text{ g C m}^{-2} \text{ d}^{-1}$ ) and Kim et  
 225 al. (2015;  $0.2 \text{ g C m}^{-2} \text{ d}^{-1}$ ). The carbon uptake rates of phytoplankton in Lee et al. (2012) and Kim et al.  
 226 (2015) were measured during December 21, 2010-January 23, 2011 and February 11 to March 14, 2012,  
 227 respectively. Our measurements in this study were executed mainly during January 1-15, 2014.

228 For the Amundsen polynya region, a large seasonal variation in the total daily carbon uptake rate of  
 229 phytoplankton was already reported by Kim et al. (2015) and Arrigo et al. (2012) based on field-measured  
 230 data and satellite-derived approach, respectively. It is appeared that this seasonal variation largely  
 231 depends on the bloom stage of phytoplankton which peaks during the late December-January and  
 232 terminates at late February (Arrigo and van Dijken 2003; Arrigo et al., 2012; Kim et al., 2015). ~~The~~  
 233 ~~carbon uptake rates of phytoplankton in Lee et al. (2012) and Kim et al. (2015) were measured during~~  
 234 ~~December 21 January 23, 2010 and February 11 to March 14, 2012, respectively. Our measurements in~~  
 235 ~~this study were executed mainly during January 1-15, 2014.~~

236 The total daily nitrogen uptake rates of phytoplankton were  $0.12 \text{ g N m}^{-2} \text{ d}^{-1}$  (S.D. =  $\pm 0.09 \text{ g N m}^{-2}$   
 237  $\text{d}^{-1}$ ) and  $0.21 \text{ g N m}^{-2} \text{ d}^{-1}$  (S.D. =  $\pm 0.11 \text{ g N m}^{-2} \text{ d}^{-1}$ ) for non-polynya and polynya regions, respectively  
 238 in this study. Previous studies reported that the total daily nitrogen uptake rates in non-polynya region  
 239 were  $0.24 \text{ g N m}^{-2} \text{ d}^{-1}$  during Dec. 21, 2010-Jan. 23, 2011~~in 2010/2011~~ and  $0.04 \text{ g N m}^{-2} \text{ d}^{-1}$  during Feb. 11  
 240 to Mar. 14, 2012~~in 2012~~ whereas the uptake rates in polynya region were  $0.93 \text{ g N m}^{-2} \text{ d}^{-1}$  in 2010/2011  
 241 and  $0.06 \text{ g N m}^{-2} \text{ d}^{-1}$  in 2012 in the Amundsen Sea (Lee et al., 2012; Kim et al., 2015). Our total daily  
 242 nitrogen uptake rates of phytoplankton in non-polynya and polynya regions were between the two  
 243 previous studies (Lee et al., 2012; Kim et al., 2015). Based on the nitrate and ammonium uptake rates in  
 244 this study,  $f$ -ratios (nitrate uptake rate/nitrate+ammonium uptake rates) averaged for non-polynya and  
 245 polynya regions were 0.62 (S.D. =  $\pm 0.08$ ) and 0.54 (S.D. =  $\pm 0.20$ ), respectively. These ratios also were  
 246 between the two previous studies. Although they were not significant different because of a large spatial  
 247 variation, larger  $f$ -ratios in non-polynya than in polynya region are consistent with the results of the

서식 있음: 들여쓰기: 첫 줄: 0 cm

서식 있음: 위 첨자/아래 첨자없음

248 previous studies (Lee et al., 2012; Kim et al., 2015). At this point, we do not have a solid explanation for  
249 that but a further future study is needed for the higher  $f$ -ratio mechanism in non-polynya region.

250 The percent contributions of small phytoplankton in terms of chlorophyll-a, POC/PON, daily  
251 carbon and nitrogen uptake rates are shown in Table 1. The overall contribution of small phytoplankton to  
252 the total chlorophyll-a concentration for all the productivity stations was 19.4 % (S.D. =  $\pm$  26.0 %) which  
253 is significantly ( $t$ -test,  $p < 0.05$ ) lower than the POC contribution ( $41.1 \pm 10.6$  %). This is consistent with  
254 the result in the Chukchi Sea, Arctic Ocean reported by Lee et al. (2013). They explained that higher POC  
255 content per chlorophyll-a unit of small phytoplankton could cause their higher POC contribution (Lee et  
256 al., 2013). Given C/N ratio (mean  $\pm$  S.D. =  $6.6 \pm 0.6$ ) and  $\delta^{13}\text{C}$  (mean  $\pm$  S.D. =  $-25.9 \pm 1.0$  ‰) of sample  
257 filters attained for POC and PON in this study, our filtered samples are believed to be mainly  
258 phytoplankton-originated POC and PON (Kim et al., 2016). Thus, a significant potential overestimated  
259 POC contribution of non-phytoplankton materials could be excluded for the higher POC contribution than  
260 chlorophyll-a contribution of small phytoplankton. Therefore, small phytoplankton contributions based on  
261 conventional assessments of chlorophyll-a concentration might lead an underestimated contribution of  
262 small phytoplankton (Lee et al., 2013). In fact, several authors argued that chlorophyll-a concentration  
263 might be not a good index for phytoplankton biomass since it largely depends on environmental factors  
264 such as nutrient and light conditions as well as dominant groups and physiological status of  
265 phytoplankton (Desortová 1981; Behrenfeld et al., 2005; Kruskopf and Flynn, 2006; Behrenfeld and Boss  
266 2006). However, the effects of non-phytoplankton carbon materials such as extracellular carbon mucilage  
267 can not be completely excluded for the POC contribution as discussed below.

268 The overall contributions of carbon and nitrogen (nitrate and ammonium) uptake rates of small  
269 phytoplankton at all the productivity stations in this study are similar with 26.9 % and 27.7 %,  
270 respectively. These contributions are relatively higher than the chlorophyll-a contribution of small  
271 phytoplankton but they are not statistically different ( $t$ -test,  $p > 0.05$ ). In general, the contribution of daily  
272 ammonium uptake rate of small phytoplankton are significantly ( $t$ -test,  $p < 0.05$ ) higher than the  
273 contribution of daily nitrate uptake rate of small phytoplankton at all the stations in this study. It is well-

274 known for the ammonium preference of small phytoplankton in various regions (Koike et al., 1986;  
275 Tremblay et al., 2000, Lee et al., 2008; Lee et al., 2013).

276 In terms of the contributions in different regions, all the contributions (Chlorophyll-a, POC/PON,  
277 carbon and nitrogen uptake rates) of small phytoplankton were higher in non-polynya region than in  
278 polynya region (Table 1). In addition, the chlorophyll-a contribution of small phytoplankton (mean  $\pm$  S.D.  
279 =  $7.9 \pm 3.5$  %) was significantly (t-test,  $p < 0.01$ ) lower than the POC contribution (mean  $\pm$  S.D. =  $36.9 \pm$   
280  $4.6$  %) in polynya region, whereas they were not statistically different in non-polynya region (Table 1).  
281 This indicates that small phytoplankton contributed more to the total POC than the chlorophyll-a  
282 concentration in the polynya region. We do not have species compositions of phytoplankton in this study,  
283 but previous results reported that *Phaeocystis* sp. are dominant in the Amundsen Sea polynya region  
284 ~~whereas diatoms are relatively dominant in the non-polynya regions~~ (Lee et al., 2012). Generally,  
285 *Phaeocystis* spp. release a large portion (up to 46 %) of extracellular carbon mucilage which makes their  
286 colonial form (Matrai et al., 1995). This non-phytoplankton carbon material without chlorophyll-a might  
287 cause a higher POC contribution of small phytoplankton in the polynya region during this study. In fact,  
288 the contribution of the daily carbon uptake rates of small phytoplankton ( $14.9 \pm 8.4$  %) was not as high as  
289 the POC contribution ( $36.9 \pm 4.6$  %) in the polynya region. The chlorophyll-a contributions of small  
290 phytoplankton were lower than that of the daily carbon uptake rate in this study, which is consistent with  
291 the results from polynya and marginal ice zone stations in the Ross Sea, Antarctica during austral spring  
292 and summer (Saggiomo et al., 1998). They reported that the chlorophyll-a and primary production  
293 contributions of pico-phytoplankton ( $< 2 \mu\text{m}$ ) were 29 % and 40 % at polynya stations whereas the  
294 contributions were 17 % and 32 % at marginal ice zone stations, respectively. In polynya region, they  
295 found much higher contributions in chlorophyll-a and primary production of small phytoplankton than  
296 those in this study although their size of small phytoplankton is somewhat smaller than our size ( $< 5 \mu\text{m}$ ).

297 We found a strong negative correlation ( $r^2 = 0.790$ ,  $p < 0.05$ ) between the productivity  
298 contributions of small phytoplankton and total daily carbon uptake rates of phytoplankton in the  
299 Amundsen Sea (Fig. 7), which implies that daily primary production decreases as small phytoplankton

300 contribution increases. This is mainly because of the relatively lower carbon uptake rate of small  
301 phytoplankton than large phytoplankton in the Chukchi Sea, Arctic Ocean reported by Lee et al. (2013).  
302 Moline et al. (2004) suggested that further warming air temperatures will increase inputs of glacial  
303 melting water and subsequently increase the contributions of small phytoplankton over large  
304 phytoplankton community (Moline et al. 2004). If these small phytoplankton were dominant under  
305 ongoing more melting conditions of glaciers, a potential increasing contribution of small phytoplankton  
306 might cause a subsequent decrease in the total primary production of phytoplankton in the Amundsen Sea  
307 based on this study in Figure 7.

308 In respect to food quality of small phytoplankton as a basic food source to herbivores,  
309 macromolecular compositions such as proteins, lipids, and carbohydrates as photosynthetic-end products  
310 will be needed for better understanding alterations of marine ecosystem in response to ongoing  
311 environmental changes (Lee et al., 2013). According to Kang et al. (accepted), small phytoplankton  
312 assimilate more food materials and calorific contents per unit of chlorophyll-a concentration and thus  
313 provide more contributions in respect to energy aspect than other phytoplankton community in the  
314 East/Japan Sea. In conclusion, monitoring the contributions of small-sized phytoplankton to total biomass  
315 and primary production of total phytoplankton community could be important as a valuable indicator to  
316 sense future changes in marine ecosystem under ongoing various climate-associated environmental  
317 changes. Moreover, further detailed studies for macromolecular compositions of small phytoplankton will  
318 be necessary for the anticipating small-dominant ecosystem under warming oceans.

319

### 320 **Acknowledgments**

321 We thank the captain and crew members of the Korean Research Icebreaker, *Araon*, for their  
322 outstanding assistance during the cruise. This research was supported by the Korea Polar Research  
323 Institute (KOPRI; PP15020).

324

**325 5. References**

- 326 Arrigo, K. R., Lowry, K. E. and van Dijken, G. L.: Annual changes in sea ice and phytoplankton in  
327 polynyas of the Amundsen Sea, Antarctica, *Deep-Sea Res. Pt. II*, 71, 5-15, 2012.
- 328 Arrigo, K. R. and van Dijken, G. L.: Continued increases in Arctic Ocean primary production, *Prog.*  
329 *Oceanogr.*, 136, 60-70, 2015.
- 330 Arrigo, K. R. and Van Dijken, G. L.: Phytoplankton dynamics within 37 Antarctic coastal polynya  
331 systems, *J. Geophys. Res.*, 108, NO. C8, 3271, doi:10.1029/2002JC001739, 2003.
- 332 Behrenfeld, M. J. and Boss, E.: Beam attenuation and chlorophyll concentration as alternative optical  
333 indices of phytoplankton biomass, *J. Mar. Res.*, 64, 431-451, 2006.
- 334 Behrenfeld, M. J., Boss, E., Siegel, D. A. and Shea, D. M.: Carbon-based ocean productivity and  
335 phytoplankton physiology from space, *Global Biogeochem. Cycles*, 19, 2005.
- 336 Desortová, B.: Relationship between chlorophyll-a concentration and phytoplankton biomass in several  
337 reservoirs in Czechoslovakia, *Internationale Revue der gesamten Hydrobiologie und*  
338 *Hydrographie*, 66, 153-169, 1981.
- 339 Ducklow, H. W., Baker, K., Martinson, D. G., Quetin, L. B., Ross, R. M., Smith, R. C., Stammerjohn, S.  
340 E., Vernet, M. and Fraser, W.: Marine pelagic ecosystems: the west Antarctic Peninsula, *Philos.*  
341 *Trans. R. Soc. Lond. B. Biol. Sci.*, 362, 67-94, 2007.
- 342 Joughin, I., Smith, B. E. and Medley, B.: Marine ice sheet collapse potentially under way for the Thwaites  
343 Glacier Basin, West Antarctica, *Science*, 344, 735-738, 2014.
- 344 Kim, B. K., Joo, H., Song, H. J., Yang, E. J., Lee, S. H., Hahm, D., Rhee, T. S. and Lee, S. H.: Large  
345 seasonal variation in phytoplankton production in the Amundsen Sea, *Polar Biol.*, 38, 319-331,  
346 2015.
- 347 Kim, B. K., Lee, J. H., Joo, H., Song, H. J., Yang, E. J., Lee, S. H. and Lee, S. H.: Macromolecular  
348 compositions of phytoplankton in the Amundsen Sea, Antarctica, *Deep-Sea Res. Pt. II*, 123, 42-49,  
349 2016.
- 350

- 351 Koike, I., Holm-Hansen, O. and Biggs, D. C.: Inorganic nitrogen metabolism by Antarctic phytoplankton  
352 with special reference to ammonium cycling, *Mar. Ecol. Prog. Ser.*, 30, 105-116, 1986.
- 353 Kruskopf, M. and Flynn, K. J.: Chlorophyll content and fluorescence responses cannot be used to gauge  
354 reliably phytoplankton biomass, nutrient status or growth rate, *New Phytol.*, 169, 525-536, 2006.
- 355 Lee, S. H., Whitley, T. E. and Kang, S.: Spring time production of bottom ice algae in the landfast sea  
356 ice zone at Barrow, Alaska, *J. Exp. Mar. Biol.*, 367, 204-212, 2008.
- 357 Lee, S. H., Kim, B. K., Yun, M. S., Joo, H., Yang, E. J., Kim, Y. N., Shin, H. C. and Lee, S.: Spatial  
358 distribution of phytoplankton productivity in the Amundsen Sea, Antarctica, *Polar Biol.*, 35, 1721-  
359 1733, 2012.
- 360 Lee, S. H., Yun, M. S., Kim, B. K., Joo, H., Kang, S.-J., Kang, C. K., Whitley, T. E.: Contribution of  
361 small phytoplankton to total primary production in the Chukchi Sea. *Cont. Shelf Res.*, 68, 43-50,  
362 2013.
- 363 Li, W. K., McLaughlin, F. A., Lovejoy, C. and Carmack, E. C.: Smallest algae thrive as the Arctic Ocean  
364 freshens, *Science*, 326, 539, 2009.
- 365 Matrai, P., Vernet, M., Hood, R., Jennings, A., Brody, E. and Saemundsdóttir, S.: Light-dependence of  
366 carbon and sulfur production by polar clones of the genus *Phaeocystis*, *Mar. Biol.*, 124, 157-167,  
367 1995.
- 368 Moline, M. A., Claustre, H., Frazer, T. K., Schofield, O. and Vernet, M.: Alteration of the food web along  
369 the Antarctic Peninsula in response to a regional warming trend, *Global Change Biol.*, 10, 1973-  
370 1980, 2004.
- 371 Montes-Hugo, M., Doney, S. C., Ducklow, H. W., Fraser, W., Martinson, D., Stammerjohn, S. E. and  
372 Schofield, O.: Recent changes in phytoplankton communities associated with rapid regional  
373 climate change along the western Antarctic Peninsula, *Science*, 323, 1470-1473, 2009.
- 374 Morán, X. A. G., LÓPEZ-URRUTIA, Á., CALVO-DÍAZ, A. and Li, W. K.: Increasing importance of  
375 small phytoplankton in a warmer ocean, *Global Change Biol.*, 16, 1137-1144, 2010.

- 376 Paolo, F. S., Fricker, H. A. and Padman, L.: Ice sheets. Volume loss from Antarctic ice shelves is  
377 accelerating, *Science*, 348, 327-331, 2015.
- 378 Rückamp, M., Braun, M., Suckro, S. and Blindow, N.: Observed glacial changes on the King George  
379 Island ice cap, Antarctica, in the last decade, *Global Planet. Change*, 79, 99-109, 2011.
- 380 Saggiomo, V., Carrada, G., Mangoni, O., d'Alcala, M. R. and Russo, A.: Spatial and temporal variability  
381 of size-fractionated biomass and primary production in the Ross Sea (Antarctica) during austral  
382 spring and summer, *J. Mar. Syst.*, 17, 115-127, 1998.
- 383 Schmidtko, S., Heywood, K. J., Thompson, A. F. and Aoki, S.: Multidecadal warming of Antarctic waters,  
384 *Science*, 346, 1227-1231, 2014.
- 385 Timothy, R. P., Yoshiaki, M. and Carol, M.: A manual of chemical and biological methods for seawater  
386 analysis, Pergamon Press, Inc, 395, 475-490, 1984.
- 387 Tremblay, J. É., Legendre, L., Klein, B. and Therriault, J.: Size-differential uptake of nitrogen and carbon  
388 in a marginal sea (Gulf of St. Lawrence, Canada): significance of diel periodicity and urea uptake,  
389 *Deep Sea Research Part II: Topical Studies in Oceanography*, 47, 489-518, 2000.
- 390 Wassmann, P., Duarte, C. M., Agusti, S. and Sejr, M. K.: Footprints of climate change in the Arctic  
391 marine ecosystem, *Global Change Biol.*, 17, 1235-1249, 2011.
- 392 Yager, P. L., Sherrell, L., Stammerjohn, S. E., Alderkamp, A., Schofield, O., Abrahamsen, E. P., Arrigo,  
393 K. R., Bertilsson, S., Garay, D. and Guerrero, R.: ASPIRE: the Amundsen Sea Polynya  
394 international research expedition, *Oceanography*, 25, 40-53, 2012.

395

396

397



398 **Table caption**

399 Table 1. Contributions (%) ~~of chlorophyll-a, POC, PON, and carbon and nitrogen uptake rates~~ of small  
400 phytoplankton in the Amundsen Sea. Contributions of chlorophyll-a, POC, PON, and carbon and nitrogen  
401 uptake rates were derived from water euphotic column-integrated values averaged from stations.  
402

403 **Figure captions**

404 Fig. 1. Sampling locations in the Amundsen Sea. Red closed circles represent productivity stations. Sea  
405 ice concentration data during the cruise period from Nimbus-7 SMMR and DMSP SSM/I-  
406 SSMIS Passive Microwave data provided by National Snow & Ice Data Center.

407 Fig. 2. Water column-integrated chlorophyll-a concentration at the productivity stations in the Amundsen  
408 Sea.

409 Fig. 3. Water column-integrated concentrations of POC and PON of small and large phytoplankton.

410 Fig. 4. Water column-integrated daily carbon uptake rates of small and large phytoplankton.

411 Fig. 5. Water column-integrated daily nitrate uptake rates of small and large phytoplankton.

412 Fig. 6. Water column-integrated daily ammonium uptake rates of small and large phytoplankton.

413 Fig. 7. Relationship between productivity contributions of small phytoplankton and the total daily carbon  
414 uptake rates of phytoplankton (large + small). The total daily carbon uptake rates were  
415 transformed into natural logs for a linear regression.

416

417

418

Table 1. Contributions (%) of small phytoplankton in the Amundsen Sea. Contributions of chlorophyll-a, POC, PON, and carbon and nitrogen uptake rates were derived from water euphotic column-integrated values averaged from stations.

서식 있음: 글꼴: 12 pt

|                     | Chlorophyll-a | POC         | PON         | Daily carbon uptake rate | Daily nitrate uptake rate | Daily ammonium uptake rate | Total nitrogen uptake rate |
|---------------------|---------------|-------------|-------------|--------------------------|---------------------------|----------------------------|----------------------------|
| <b>All stations</b> | 19.4 ± 26.0   | 41.1 ± 10.6 | 41.3 ± 11.5 | 26.9 ± 29.3              | 21.5 ± 11.1               | 38.7 ± 24.9                | 27.7 ± 14.4                |
| <b>Non-polynya</b>  | 42.4 ± 37.2   | 49.5 ± 14.4 | 50.0 ± 15.1 | 50.8 ± 42.8              | 28.2 ± 15.9               | 52.8 ± 40.5                | 36.2 ± 23.0                |
| <b>Polynya</b>      | 7.9 ± 3.5     | 36.9 ± 4.6  | 37.0 ± 6.9  | 14.9 ± 8.4               | 18.1 ± 6.8                | 31.6 ± 10.1                | 23.5 ± 6.0                 |

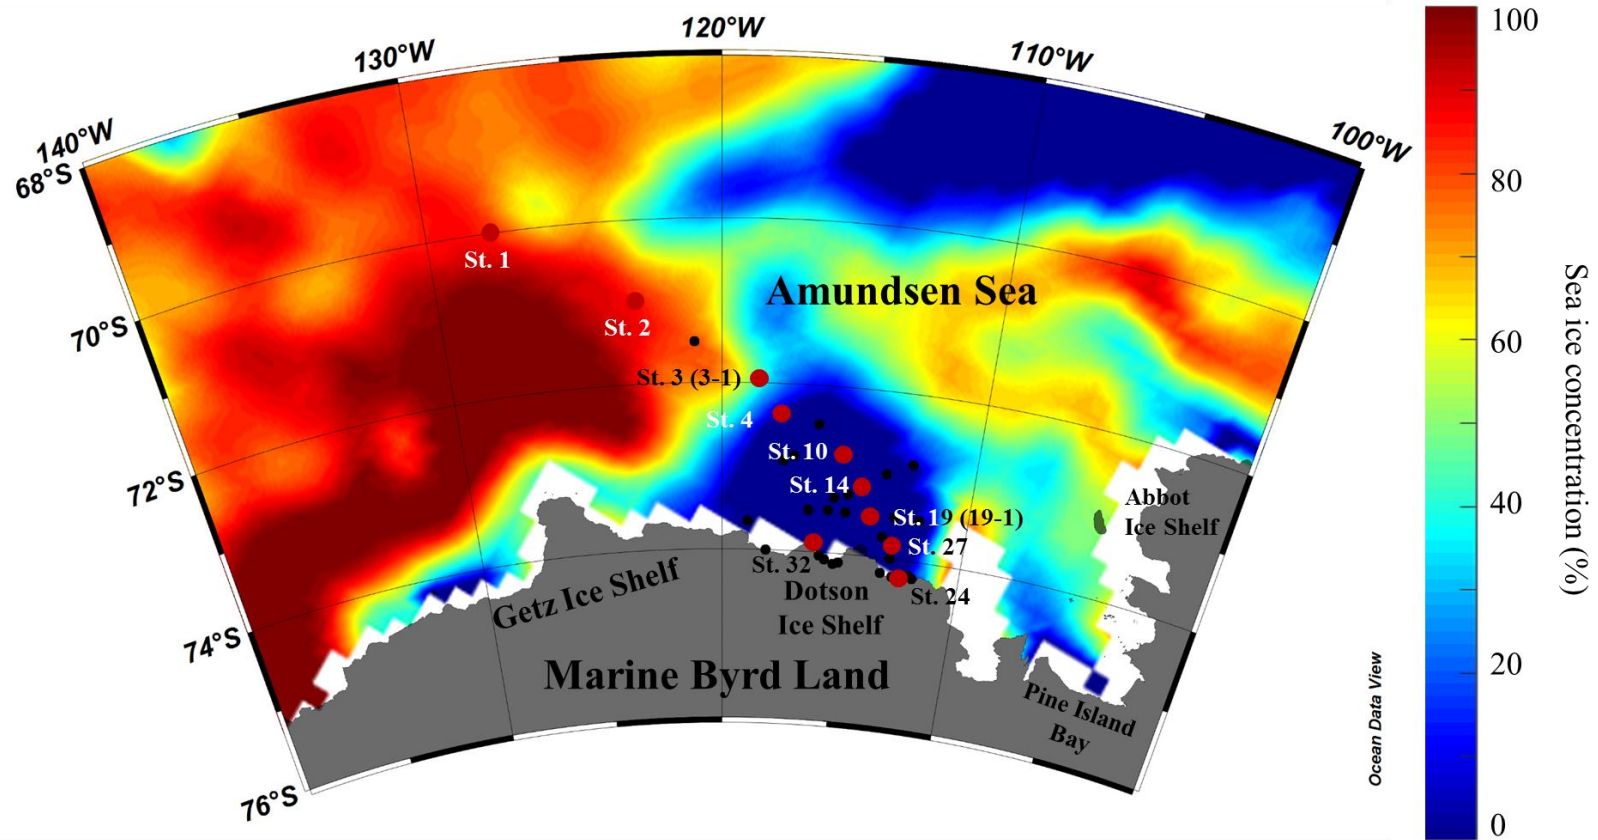

Fig. 1. Sampling locations in the Amundsen Sea. Red closed circles represent productivity stations. Sea ice concentration data during the cruise period from Nimbus-7 SMMR and DMSP SSM/I-SSMIS Passive Microwave data provided by National Snow & Ice Data Center.

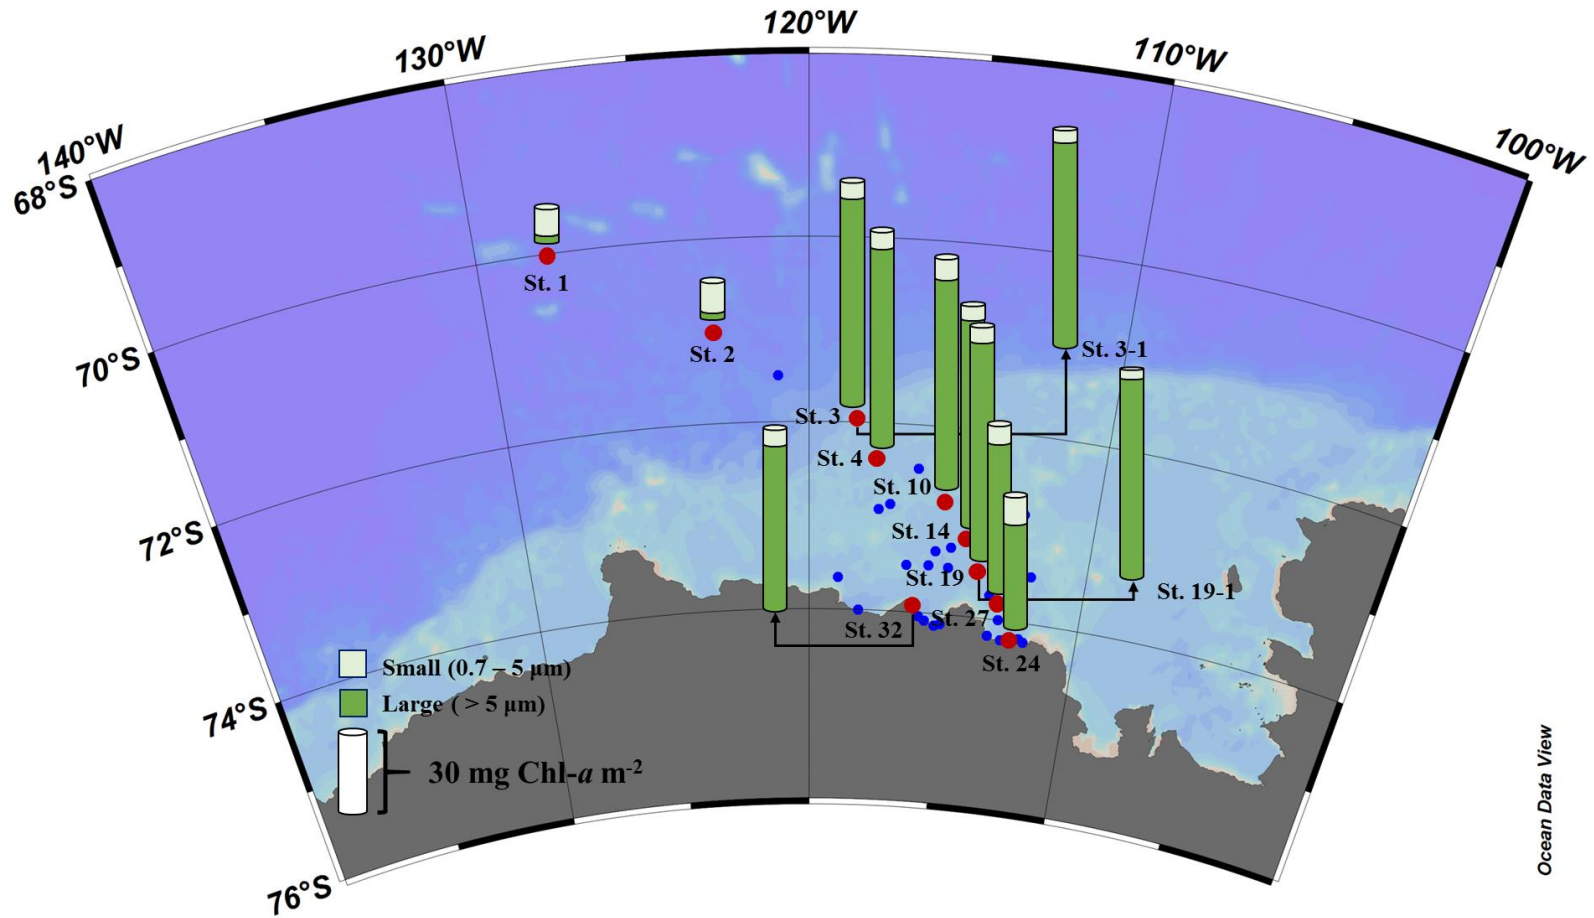

Fig. 2. Water column-integrated chlorophyll-a concentration at the productivity stations in the Amundsen Sea.

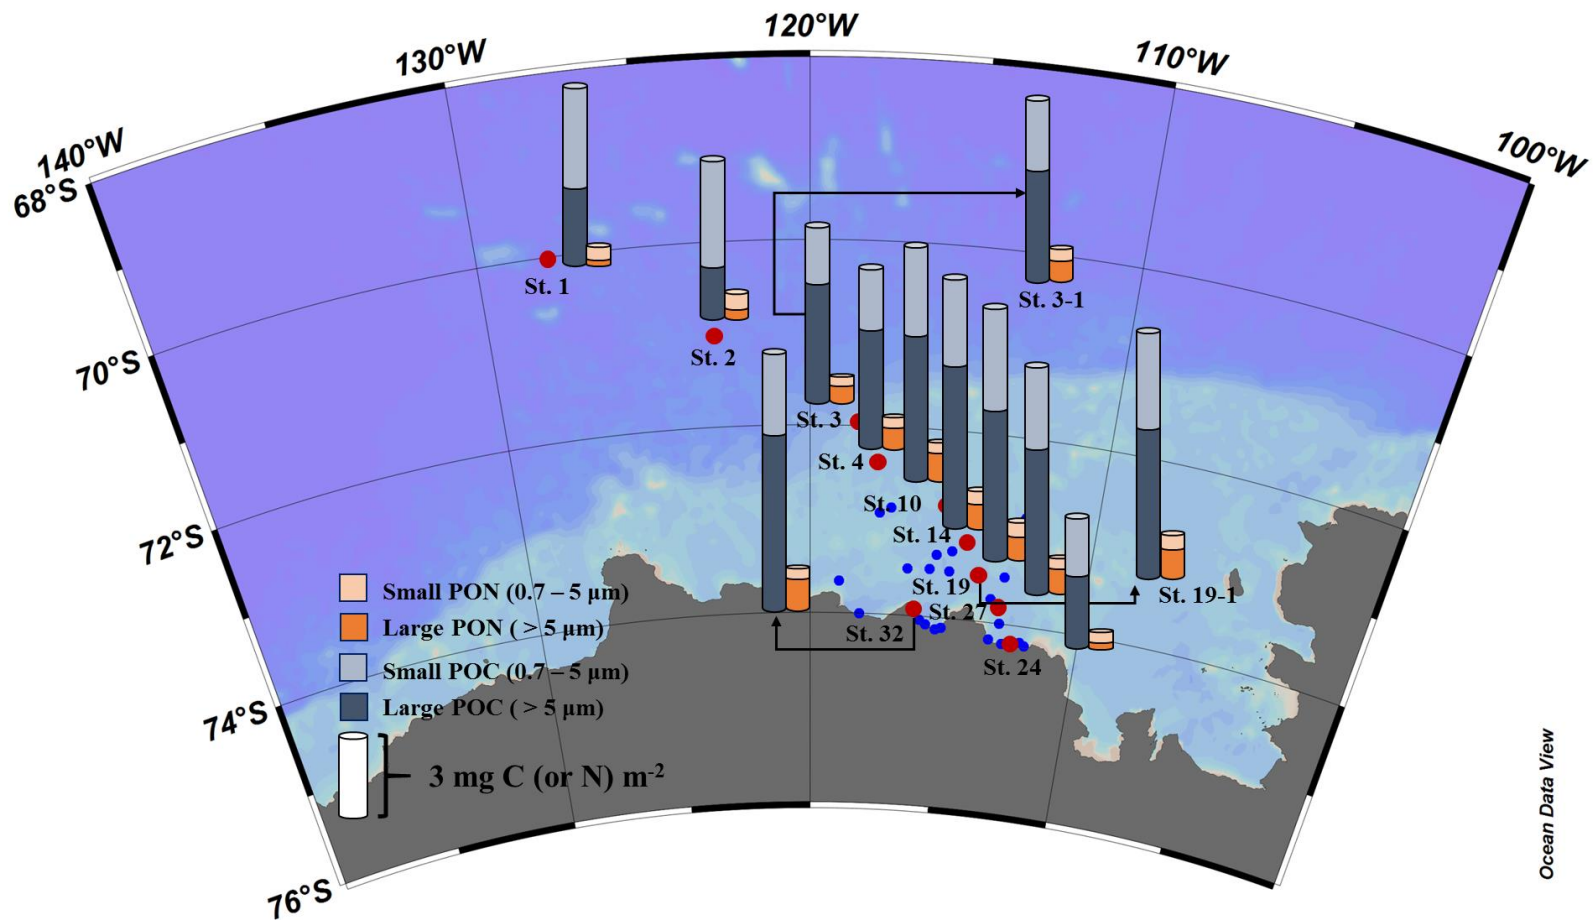

Ocean Data View

Fig. 3. Water column-integrated concentrations of POC and PON of small and large phytoplankton.

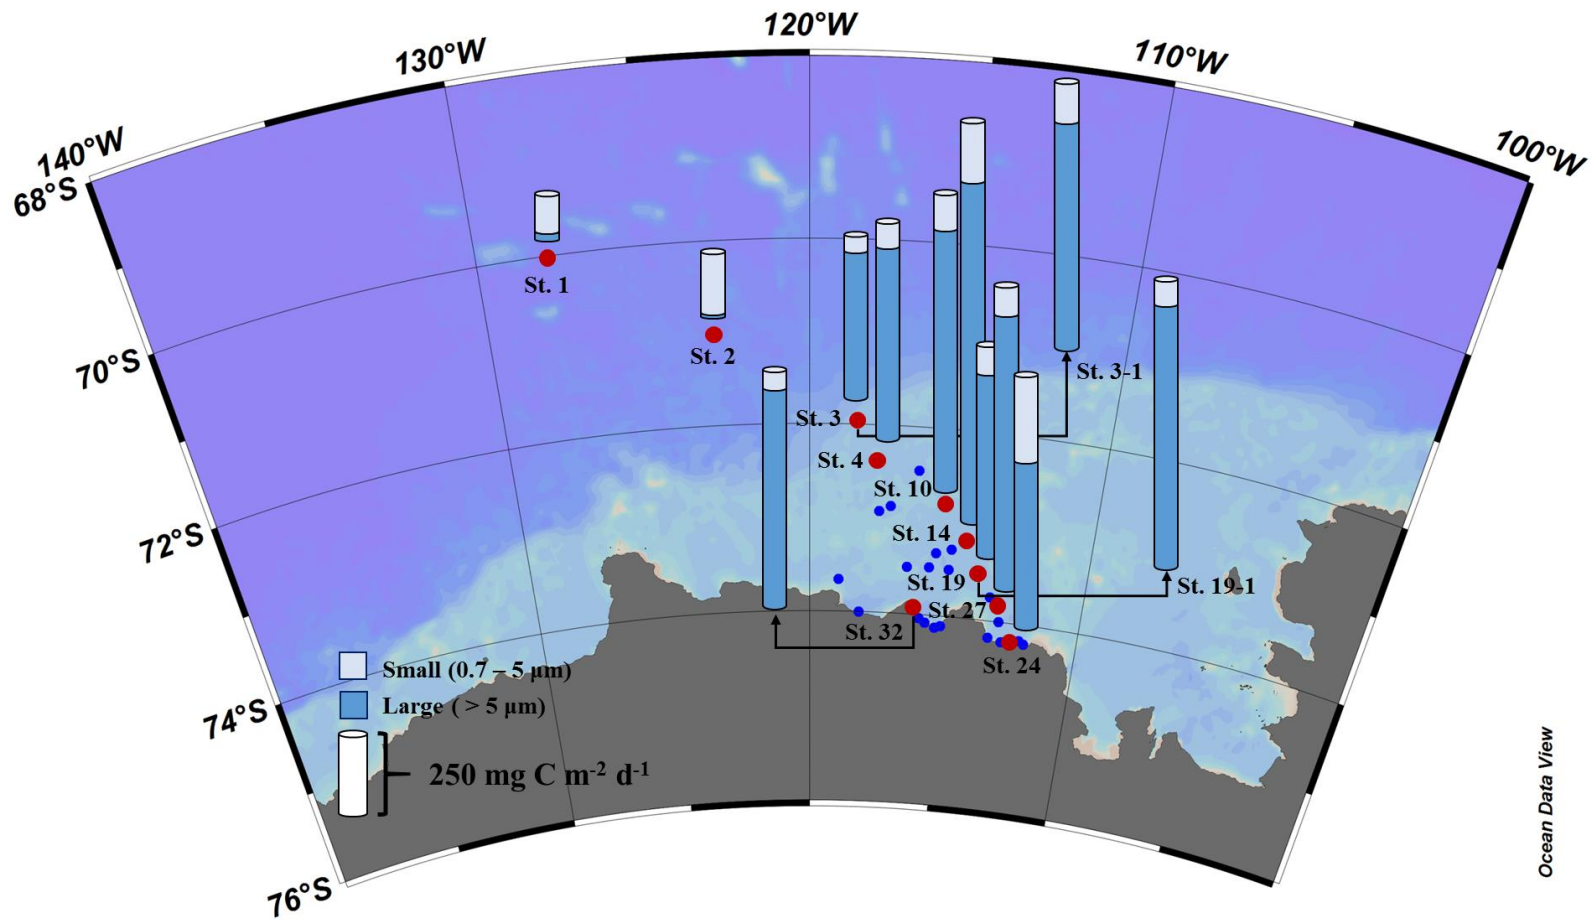

Ocean Data View

Fig. 4. Water column-integrated daily carbon uptake rates of small and large phytoplankton.



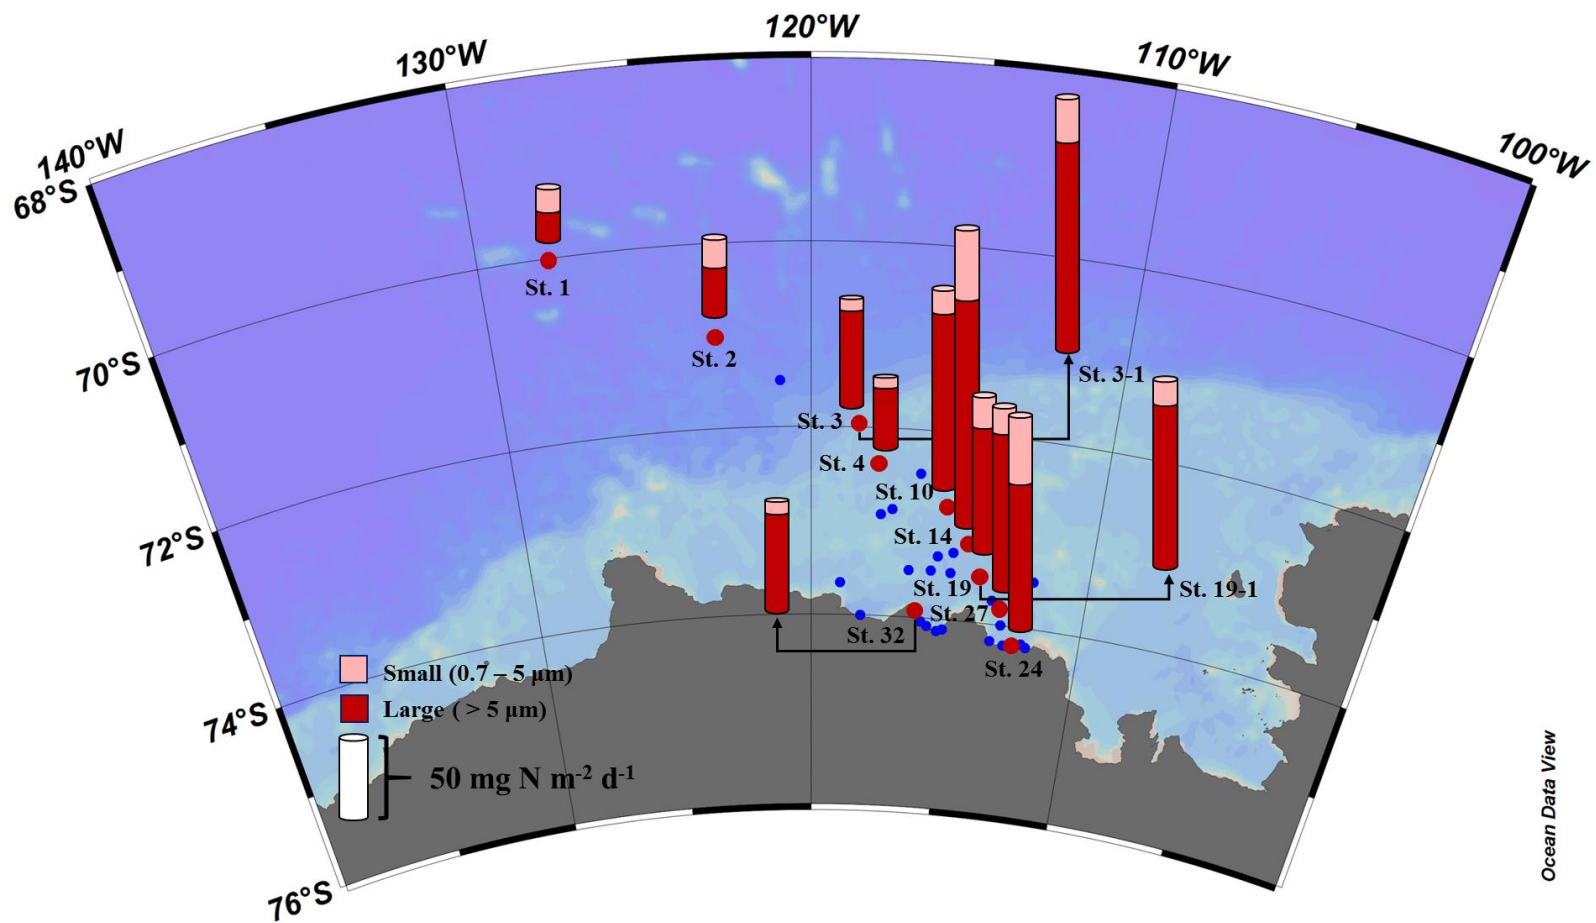

Fig. 5. Water column-integrated daily nitrate uptake rates of small and large phytoplankton.



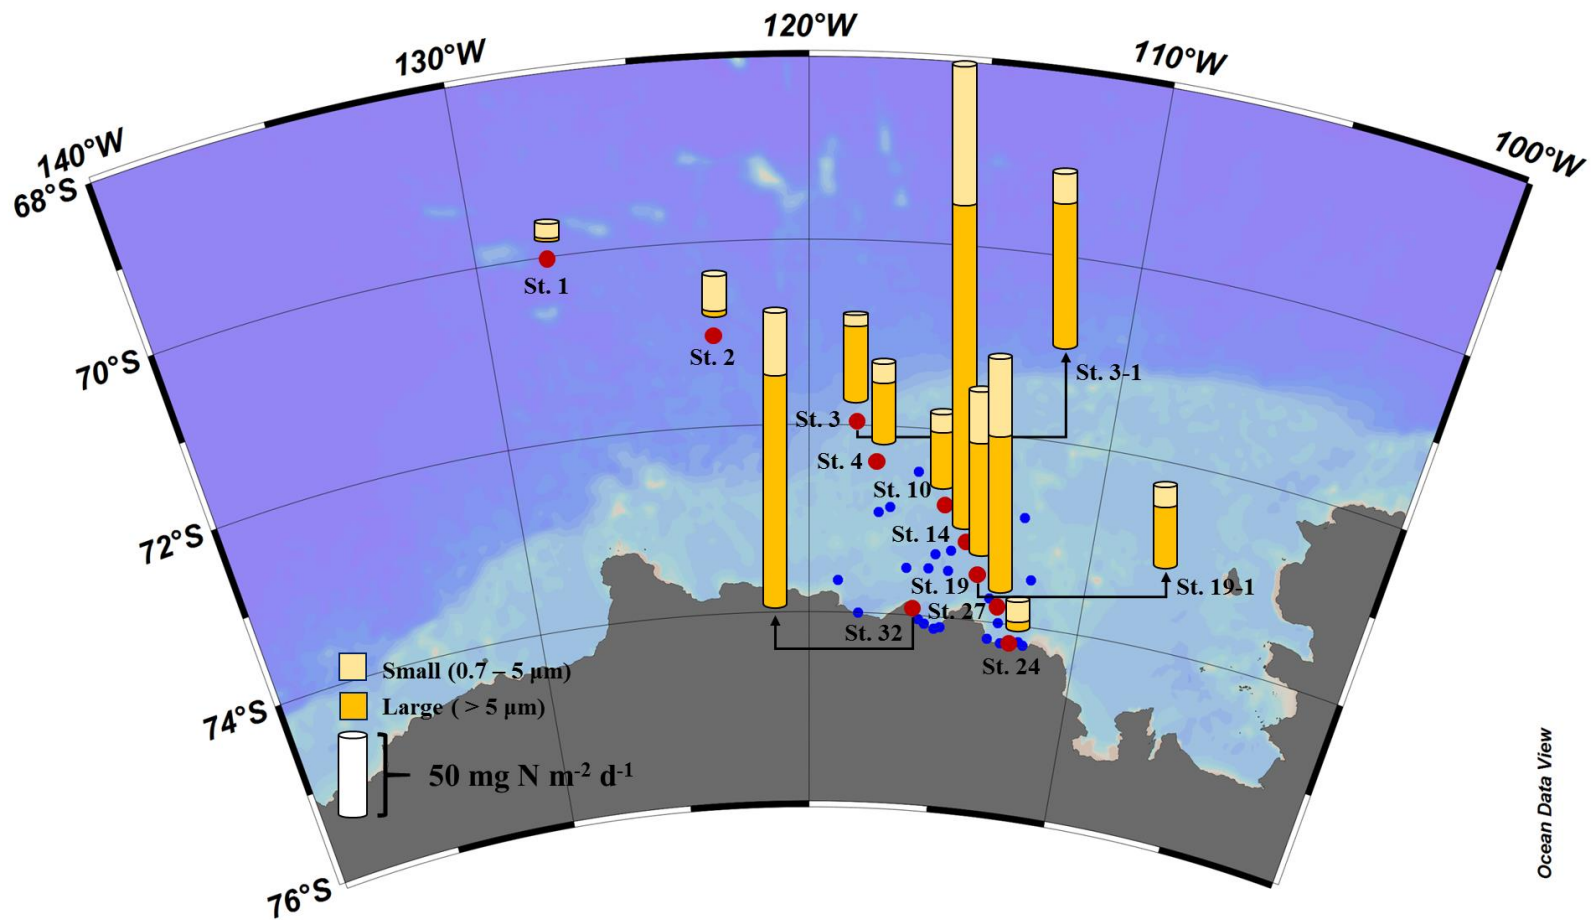

Fig. 6. Water column-integrated daily ammonium uptake rates of small and large phytoplankton.

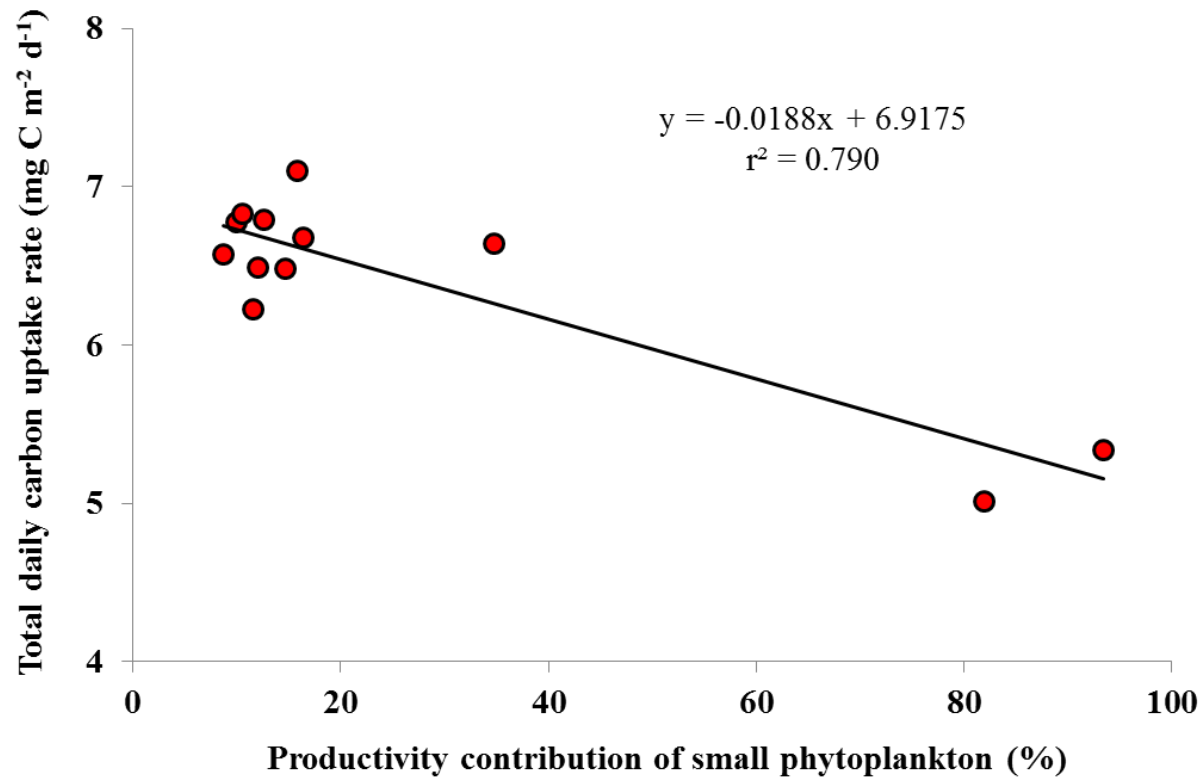

Fig. 7. Relationship between productivity contributions of small phytoplankton and the total daily carbon uptake rates of phytoplankton (large + small). The total daily carbon uptake rates were transformed into natural logs for a linear regression.
