# Supplementary material for: Small phytoplankton contribution to the total primary production in the Amundsen Sea
Source: Copernicus journal article supplement (doi:10.5194/bg-2016-453), 2016-10-24
Supplement: Supplementary file [file bg-2016-453-AC2-supplement.pdf]

## 17 Abstract

18 Small-sized phytoplankton ~~is~~are anticipated to be more important ~~for phytoplankton community~~  
19 in a recent~~ly~~ changing ocean condition. However, little information on the contribution of small-sized  
20 phytoplankton to overall phytoplankton production is currently available in the Amundsen Sea. To  
21 determine the contributions of small-sized phytoplankton to total biomass and primary production, carbon  
22 and nitrogen uptake rates of total and small-sized phytoplankton were obtained from 12 productivity  
23 stations in the Amundsen Sea. The daily carbon uptake rates of total phytoplankton averaged in this study  
24 were  $0.42 \text{ g C m}^{-2} \text{ d}^{-1}$  (S.D. =  $\pm 0.30 \text{ g C m}^{-2} \text{ d}^{-1}$ ) and  $0.84 \text{ g C m}^{-2} \text{ d}^{-1}$  (S.D. =  $\pm 0.18 \text{ g C m}^{-2} \text{ d}^{-1}$ ) whereas  
25 the daily total nitrogen (nitrate and ammonium) uptake rates were  $0.12 \text{ g N m}^{-2} \text{ d}^{-1}$  (S.D. =  $\pm 0.09 \text{ g N m}^{-2}$   
26  $\text{d}^{-1}$ ) and  $0.21 \text{ g N m}^{-2} \text{ d}^{-1}$  (S.D. =  $\pm 0.11 \text{ g N m}^{-2} \text{ d}^{-1}$ ), respectively for non-polynya and polynya regions,  
27 which were within the ranges reported previously. Small phytoplankton contributed 26.9 % and 27.7 % to  
28 the total carbon and nitrogen uptake rates of phytoplankton in this study, respectively, which were  
29 relatively higher than the chlorophyll-a contribution (19.4 %) of small phytoplankton. For a comparison  
30 of different regions, the contributions for chlorophyll-a concentration and primary production of small  
31 phytoplankton averaged from all the non-polynya stations were 42.4 % and 50.8 %, which were  
32 significantly higher than those (7.9 % and 14.9 %, respectively) in polynya region. A strong negative  
33 correlation ( $r^2 = 0.790$ ,  $p < 0.05$ ) was found between the contributions of small phytoplankton and the  
34 total daily primary production of phytoplankton in this study. This finding implies that daily primary  
35 production decreases as small phytoplankton contribution increases, which is mainly due to the lower  
36 carbon uptake rate of small phytoplankton than large phytoplankton. ~~Under ongoing environmental~~  
37 ~~changes caused by global warming, a potential decrease of total primary production would be led by~~  
38 ~~increasing contribution of small phytoplankton in the Amundsen Sea.~~

39

40

41 Keywords: Phytoplankton, Primary production, Polynya, Amundsen Sea

42

## 43 1. Introduction

44 The Amundsen Sea is located in the West Antarctica between the Ross Sea and Bellingshausen  
45 Sea (Fig. 1), which is one of the least-biologically studied regions in the Southern Ocean. Recently  
46 several international research programs (KOPRI Amundsen project, iSTAR, ASPIRE, and DynaLiFe)  
47 were launched to understand this remote area. Field-measurement data revealed that annual primary  
48 production of phytoplankton reaching to  $220 \text{ g C m}^{-2} \text{ y}^{-1}$  in the Amundsen Sea polynya is as high as that  
49 of Ross Sea polynya ( $200 \text{ g C m}^{-2} \text{ y}^{-1}$ ) which was previously known for the highest productivity region in  
50 the Southern Ocean (Lee et al., 2012). Given the fact that the ~~chl-a~~ chlorophyll-a concentration averaged  
51 from all the chlorophyll-a-measured stations was twice higher than that of the only productivity-  
52 measured stations, Lee et al., (2012) argued that the annual production in the Amundsen Sea polynya  
53 could be even two-fold higher than that of Ross Sea polynya.

54 Over the past several decades a rapid climate change has been detected and subsequently  
55 physical changes have occurred in the marine ecosystem in the western Antarctic Peninsula (WAP)  
56 mainly based on the results from Palmer Antarctic Long-Term Ecological Research project which focused  
57 on the north of  $\sim 69^\circ \text{S}$  (Rückamp et al. 2011; Ducklow et al. 2007; Montes-Hugo et al. 2009). Recent  
58 studies revealed that the Thwaites Glacier in Pine Island Bay is retreating fast and the ice volume loss in  
59 the nearby Getz Ice shelf is accelerating (Joughin et al., 2014; Paolo et al., 2015). Shoaling warm  
60 Circumpolar Deep Water is believed to be a main reason for the ice sheet mass loss largely caused by ice  
61 shelf basal melt underside of the ice shelves (Yager et al. 2012; Schmidtko et al. 2014). The climate  
62 change from a cold-dry polar-type to a warm-humid sub-Antarctic-type drives subsequent changes in  
63 ocean biological productivity along the WAP shelf over the recent three decades (Montes-Hugo et al.  
64 2009).

65 Phytoplankton as the base of oceanic food webs can be an indicator for changes in marine  
66 ecosystems responding to current climate changes (Moline et al., 2004; Wassman et al., 2011; Arrigo et  
67 al., 2015). In an ~~expecting~~ warmer ocean condition, small-sized phytoplankton ~~is~~are anticipated to  
68 contribute more to total phytoplankton community and thus marine ecosystems (Morán et al., 2010; Li et

69 al., 2009; Lee et al., 2013). ~~In consistent~~ In the Arctic Ocean, Li et al. (2009) found that increasing small-  
70 sized phytoplankton in the Canada Basin ~~in the Arctic Ocean have been increasing~~ under a warming and  
71 freshening surface waters which results in a stronger stratification and lower nutrient supply in the upper  
72 water column. ~~Moreover, in the Antarctic Ocean, Moline et al. (2004) found a consistent transition from~~  
73 ~~large diatoms to small cryptophytes associated with glacial melt water in the coastal waters along the~~  
74 ~~Antarctic Peninsula in response to a regional warming trend. This change in dominant phytoplankton~~  
75 ~~community from large to small cells will likely cause further alteration of higher trophic levels and~~  
76 ~~subsequent food web (Moline et al., 2004).~~ However, little information on the contribution of small-sized  
77 phytoplankton to primary production is available in the Antarctic Ocean (Saggiomo et al. 1998),  
78 especially in the Amundsen Sea with a rapid melting of ice shelf (Yager et al. 2012; Schmidtko et al.  
79 2014). Thus, the main objective in this study is to determine that to what extent small-sized  
80 phytoplankton contributes to overall total biomass and primary production in the Amundsen Sea to lay the  
81 groundwork for the future monitoring of marine ecosystem ~~change~~ responding to ongoing climate  
82 changes ~~in environmental conditions~~.

83

## 84 2. Materials and methods

### 85 2.1. Water Sampleings

86 Water samples were collected for carbon and nitrogen uptake measurements of phytoplankton in  
87 the Amundsen Sea (Fig. 1) during the KOPRI Amundsen cruise from 1 to 15 January, 2014 onboard the  
88 Korean Research Icebreaker ship *Araon*. Using a dual stable isotope technique (Lee et al., 2012; Kim et  
89 al., 2015), the experiments of carbon and nitrogen uptake rates of phytoplankton were conducted at 12  
90 selected productivity stations including 2 revisited-stations (St. 3-1 and St. 19-1) when on-deck  
91 incubations were available during daytime at oceanographic survey stations. Based on sea ice  
92 concentration data from National Snow & Ice Data Center during the cruise period (Fig. 1), our study  
93 region was further separated into polynya and non-polynya areas for comparison based on sea ice  
94 distribution and concentration during the cruise period. Four stations (St. 1, St. 2, St. 3, and St. 3-1)

95 | among the 12 stations ~~were~~ belong to non-polynya region and the rest of the stations ~~were~~ belong to  
96 | polynya region.

97 |         After 6 light depths (100, 50, 30, 12, 5, and 1% penetration of the surface irradiance, PAR) were  
98 | determined with an LI-COR underwater  $4\pi$  light sensor, water samples for the uptake experiments ~~as~~  
99 | ~~well as biological and chemical property analysis~~ were obtained from a CTD-rosette sampler system  
100 | equipped with 24 10-L Niskin bottles.

### 101 | *2.2. Total and size-fractionated chlorophyll-a concentration*

102 |         Water samples for total and size-fractionated chlorophyll-a concentrations of phytoplankton were  
103 | obtained at the 12 productivity stations. Total chlorophyll-a concentrations were measured at six different  
104 | light depths (100, 50, 30, 12, 5 and 1% of PAR). For size-fractionated chlorophyll-a concentrations, water  
105 | samples were collected at three light depths (100, 30, and 1 %). Water samples (0.3–0.5 L) for total  
106 | chlorophyll-a concentrations were filtered using Whatman glass fiber filters (GF/F; 25 mm). For different  
107 | size-fractionated chlorophyll-a concentrations water samples (0.7–1 L) were passed sequentially through  
108 | 20 and 5  $\mu\text{m}$  Nucleopore filters (47 mm) and 0.7  $\mu\text{m}$  GF/F filters (47 mm). After the filters were extracted  
109 | using the method described by Kim et al. (2015), all chlorophyll-a concentrations were subsequently  
110 | determined onboard using a Trilogy fluorometer (Turner Designs, USA). The methods and calculations  
111 | for chlorophyll-a were based on Parsons et al. (1984).

### 112 | *2.3. Carbon and nitrogen uptake experiments*

113 |         ~~Carbon and nitrogen uptake experiments of phytoplankton were executed by a  $^{13}\text{C}$ - $^{15}\text{N}$  dual~~  
114 | ~~isotope tracer technique previously applied for the Amundsen Sea (Lee et al. 2012; Kim et al. 2015). In~~  
115 | ~~this study, basically we followed same procedure of Lee et al. (2012). In brief, six light depths (100, 50,~~  
116 | ~~30, 12, 5, and 1%) were determined with an LI-COR underwater  $4\pi$  light sensor (LI-COR Inc., Lincoln,~~  
117 | ~~Nebraska, USA) lowered with CTD/rosette sampler.~~ Water sample from each light depth was transferred  
118 | into different screened polycarbonate incubation bottle (1 L) which matches with each light depth. The  
119 | productivity bottles were incubated in large polycarbonate material incubators cooled with running

120 surface seawater on deck under natural light conditions, after the water samples were inoculated with  
121 labeled carbon ( $\text{NaH}^{13}\text{CO}_3$ ) and nitrate ( $\text{K}^{15}\text{NO}_3$ ) or ammonium ( $^{15}\text{NH}_4\text{Cl}$ ) substrates. After 4–5 h  
122 incubations, the incubated waters were well mixed and distributed into two filtration sets for the carbon  
123 and nitrogen uptake rates of total ( $> 0.7 \mu\text{m}$ ) and small-sized cells ( $< 5 \mu\text{m}$ ). The incubated waters (0.3 L)  
124 for total uptake rates were filtered through pre-combusted GF/F filters (24 mm diameter), whereas waters  
125 samples (0.5 L) for the uptake rates of small-sized cells were passed through  $5 \mu\text{m}$  Nuclepore filters (47  
126 mm) to remove large-sized cells ( $> 5 \mu\text{m}$ ) and then the filtrate was passed through GF/F (24 mm) for the  
127 small-sized cells (Lee et al., 2013). The values for large phytoplankton in this study were obtained from  
128 the difference between small and total fractions (Lee et al., 2013). The filters were immediately preserved  
129 at  $-80^\circ\text{C}$  until mass spectrometric analysis. After acid fuming overnight to remove carbonate, the  
130 concentrations of particulate organic carbon (POC) and nitrogen (PON) and the abundance of  $^{13}\text{C}$  and  
131  $^{15}\text{N}$  were determined by a Finnigan Delta+XL mass spectrometer at the Alaska Stable Isotope Facility,  
132 USA.

133 All contribution results of small phytoplankton in this study were estimated from comparison of  
134 small phytoplankton to total phytoplankton integral values from 100 to 1 % light depth at each station  
135 based on the trapezoidal rule. Daily carbon and nitrogen uptake rates of phytoplankton were based on our  
136 hourly uptake rates measured in this study and a 24-h photoperiod per day during the summer period in  
137 the Amundsen Sea (Lee et al., 2012).

138

### 139 3. Results

#### 140 3.1. Chlorophyll-a, POC, and PON contributions of small phytoplankton

141 The ~~depth-integrated~~ total (large + small phytoplankton) chlorophyll-a concentration ~~integrated~~  
142 ~~from six different light depths~~ ranged from 11.1 to 80.3  $\text{mg chl-a m}^{-2}$  (mean  $\pm$  S.D. =  $57.4 \pm 25.2 \text{ mg chl-a}$   
143  $\text{m}^{-2}$ ), whereas small ( $< 5 \mu\text{m}$ ) chlorophyll-a concentration ranged from 3.9 to 9.4  $\text{mg chl-a m}^{-2}$  (~~mean  $\pm$~~   
144 ~~S.D.~~ =  $5.7 \pm 1.7 \text{ mg chl-a m}^{-2}$ ) in this study (Fig. 2). The ~~average~~ contribution of small phytoplankton to

145 the total chlorophyll-a concentration was ~~4.9-76.5 %~~ 19.4 % (~~S.D. = 19.4 ± 26.0 %~~) ~~ranging from 4.9 to~~  
 146 ~~76.5 %~~. ~~In the Amundsen Sea,~~ Large phytoplankton (> 5 µm) were generally predominant  
 147 (approximately 80 %) during the cruise period ~~in 2014~~ based on different-sized chlorophyll-a  
 148 concentrations. For a regional comparison, the average contributions of small phytoplankton to the total  
 149 chlorophyll-a concentration were 42.4 % (~~S.D. = ± 37.2 %~~) and 7.9 % (~~S.D. = ± 3.5 %~~) for non-polynya  
 150 and polynya regions, respectively. The chlorophyll-a contribution of small phytoplankton was larger in  
 151 the non-polynya regionstations than the polynya regionstations although they were not significantly  
 152 different (t-test, p = 0.16).

153 The total integral POC concentration of phytoplankton displayed no large spatial variation  
 154 ranging from 4.72 to 9.22 mg C m<sup>-2</sup> (Fig. 3). In comparison, the total integral PON concentration of  
 155 phytoplankton ranged from 0.76 to 1.74 mg C m<sup>-2</sup>. The POC contribution of small phytoplankton ranged  
 156 from 30.7 to 65.5 % (~~mean ± S.D. = 41.1 ± 10.6 %~~), whereas the PON contribution ranged similarly from  
 157 30.8 to 67.2 % (~~mean ± S.D. = 41.3 ± 11.5 %~~) in the Amundsen Sea (Fig. 3). Specifically, the POC and  
 158 PON contributions of small phytoplankton averaged from all the productivity stations in the polynya  
 159 regionstations were 36.9 % (~~S.D. = ± 4.6 %~~) and 37.0 % (~~S.D. = ± 6.9 %~~), respectively. In comparison,  
 160 the POC and PON contributions of small phytoplankton averaged from the non-polynya regionstations  
 161 were 49.5 % (~~S.D. = ± 14.4 %~~) and 50.0 % (~~S.D. = ± 15.1 %~~), respectively.

### 162 3.2. Carbon uptake rate contributions of small phytoplankton

163 The depth-integrated total daily carbon uptake rates of phytoplankton (large + small  
 164 phytoplankton) ~~integrated from six different light depths~~ ranged from 150.4 to 1213.4 mg C m<sup>-2</sup> d<sup>-1</sup> ~~with~~  
 165 ~~an average of (696.5 mg C m<sup>-2</sup> d<sup>-1</sup> (S.D. = ± 298.4 mg C m<sup>-2</sup> d<sup>-1</sup>))~~ in this study (Fig. 4). In contrast, the  
 166 rates of small phytoplankton ranged between 58.6 and 266.4 mg C m<sup>-2</sup> d<sup>-1</sup> ~~with an average of (124.9 mg C~~  
 167 ~~m<sup>-2</sup> d<sup>-1</sup> (S.D. = ± 62.4 mg C m<sup>-2</sup> d<sup>-1</sup>)).~~ Small phytoplankton contributed 26.9 % (~~S.D. = ± 29.3%~~) to total  
 168 daily carbon uptake rate of total phytoplankton.

169 Specifically, the total daily carbon uptake rates of phytoplankton ranged from 150.4 to 796.4 mg  
 170 C m<sup>-2</sup> d<sup>-1</sup> ~~with an average of (415.0 mg C m<sup>-2</sup> d<sup>-1</sup> (S.D. = ± 298.2 mg C m<sup>-2</sup> d<sup>-1</sup>))~~ in the non-polynya region,

171 whereas they ranged from 654.8 to 1213.4 mg C m<sup>-2</sup> d<sup>-1</sup> ~~with an average of (837.3 mg C m<sup>-2</sup> d<sup>-1</sup> (S.D. = ±~~  
 172 184.1 mg C m<sup>-2</sup> d<sup>-1</sup>) in the polynya region. The total daily carbon uptake rates of phytoplankton were  
 173 significantly higher (t-test, p < 0.05) in the polynya regionstations than the non-polynya regionstations.  
 174 The rates of small phytoplankton ranged between 58.6 and 193.6 mg C m<sup>-2</sup> d<sup>-1</sup> ~~with an average of (126.5~~  
 175 ~~mg C m<sup>-2</sup> d<sup>-1</sup> (S.D. = ± 55.2 mg C m<sup>-2</sup> d<sup>-1</sup>)~~ in the non-polynya region, whereas they ranged from 62.2 to  
 176 266.4 mg C m<sup>-2</sup> d<sup>-1</sup> ~~with an average of (124.1 mg C m<sup>-2</sup> d<sup>-1</sup> (S.D. = ± 69.3 mg C m<sup>-2</sup> d<sup>-1</sup>)~~ in the polynya  
 177 region. The daily carbon uptake rates of small phytoplankton were not significantly different (t-test, p >  
 178 0.05) between the polynya and non-polynya stations. The average contributions of small phytoplankton to  
 179 total daily carbon uptake rates were 50.8 % (S.D. = ± 42.8 %) and 14.9 % (S.D. = ± 8.4 %), respectively  
 180 for the non-polynya and polynya regions. The average contributions were largely different between the  
 181 polynya and non-polynya regions but they were not statistically significant (t-test, p > 0.05).

### 182 3.3. Nitrogen uptake rate contributions of small phytoplankton

183 The depth-integrated total daily nitrate uptake rates of phytoplankton (large + small  
 184 phytoplankton) ranged from 34.0 to 174.2 mg N m<sup>-2</sup> d<sup>-1</sup> ~~with an average of (93.7 mg N m<sup>-2</sup> d<sup>-1</sup> (S.D. = ±~~  
 185 43.2 mg N m<sup>-2</sup> d<sup>-1</sup>), whereas the rates of small phytoplankton ranged from 6.1 to 40.9 mg N m<sup>-2</sup> d<sup>-1</sup> ~~with~~  
 186 ~~an average of (19.0 mg N m<sup>-2</sup> d<sup>-1</sup> (S.D. = ± 11.3 mg N m<sup>-2</sup> d<sup>-1</sup>)~~ in this study (Fig. 5). Small phytoplankton  
 187 contributed 21.5 % (S.D. = ± 11.1 %) to total daily nitrate uptake rates. In comparison, the total daily  
 188 ammonium uptake rates of phytoplankton ranged from 12.4 to 173.8 mg N m<sup>-2</sup> d<sup>-1</sup> ~~with an average of~~  
 189 ~~(86.7 mg N m<sup>-2</sup> d<sup>-1</sup> (S.D. = ± 75.9 mg N m<sup>-2</sup> d<sup>-1</sup>)~~, whereas the rates of small phytoplankton ranged from  
 190 9.1 to 81.1 mg N m<sup>-2</sup> d<sup>-1</sup> ~~with an average of (25.7 mg N m<sup>-2</sup> d<sup>-1</sup> (S.D. = ± 21.1 mg N m<sup>-2</sup> d<sup>-1</sup>)~~ in this study  
 191 (Fig. 6). Small phytoplankton contributed 38.7 % (S.D. = ± 24.9 %) to total daily ammonium uptake rates.  
 192 The contributions of small phytoplankton were significantly higher in ammonium uptake rate than nitrate  
 193 uptake rate (t-test, p < 0.05).

194 Specifically for different regions, the total daily nitrate uptake rates of phytoplankton ranged from  
 195 34.0 to 142.1 mg N m<sup>-2</sup> d<sup>-1</sup> ~~with an average of (71.9 mg N m<sup>-2</sup> d<sup>-1</sup> (S.D. = ± 48.4 mg N m<sup>-2</sup> d<sup>-1</sup>)~~ in the non-  
 196 polynya region whereas they ranged from 44.2 to 174.2 mg N m<sup>-2</sup> d<sup>-1</sup> ~~with an average of (104.6 mg N m<sup>-2</sup>~~



197  $\text{d}^{-1}$  ( $\text{S.D.} = \pm 39.0 \text{ mg N m}^{-2} \text{ d}^{-1}$ ) in the polynya region, respectively. In comparison, the daily nitrate  
 198 uptake rates of small phytoplankton ranged from 7.5 to 26.6  $\text{mg N m}^{-2} \text{ d}^{-1}$  ~~with an average of (16.7  $\text{mg N}$~~   
 199  ~~$\text{m}^{-2} \text{ d}^{-1}$  ( $\text{S.D.} = \pm 7.8 \text{ mg N m}^{-2} \text{ d}^{-1}$ )~~ and from 6.1 to 40.9  $\text{mg N m}^{-2} \text{ d}^{-1}$  ~~with an average of (20.1  $\text{mg N m}^{-2}$~~   
 200  ~~$\text{d}^{-1}$  ( $\text{S.D.} = \pm 13.1 \text{ mg N m}^{-2} \text{ d}^{-1}$ ),~~ respectively for the non-polynya and polynya regions. The contributions  
 201 of small phytoplankton to the total daily nitrate uptake rates were 28.2 % ( $\text{S.D.} = \pm 15.9$  %) in the non-  
 202 polynya region and 18.1 % ( $\text{S.D.} = \pm 6.8$  %) in the polynya region, respectively. The total daily  
 203 ammonium uptake rates of total phytoplankton ranged between 12.3 and 106.1  $\text{mg N m}^{-2} \text{ d}^{-1}$  (~~mean  $\pm$  S.D.~~  
 204  ~~$= 49.7 \pm 41.2 \text{ mg N m}^{-2} \text{ d}^{-1}$ )~~ in the non-polynya region and between 18.1 and 269.3  $\text{mg N m}^{-2} \text{ d}^{-1}$  (~~mean  $\pm$~~   
 205  ~~$\text{S.D.} = 105.2 \pm 84.6 \text{ mg N m}^{-2} \text{ d}^{-1}$ )~~ in the polynya region. In comparison, the rates of small phytoplankton  
 206 ranged between 9.1 and 22.4  $\text{mg N m}^{-2} \text{ d}^{-1}$  (~~mean  $\pm$  S.D. = 15.8  $\pm$  6.4  $\text{mg N m}^{-2} \text{ d}^{-1}$ )~~ in the non-polynya  
 207 region and between 9.9 and 81.1  $\text{mg N m}^{-2} \text{ d}^{-1}$  (~~mean  $\pm$  S.D. = 30.7  $\pm$  24.5  $\text{mg N m}^{-2} \text{ d}^{-1}$ )~~ in the polynya  
 208 region. Small phytoplankton contributed 52.8 % ( $\text{S.D.} = \pm 40.5$  %) and 31.6 % ( $\text{S.D.} = \pm 10.1$  %) to the  
 209 total daily ammonium uptake rates in the non-polynya and polynya regions, respectively which were not  
 210 significantly different (t-test,  $p = 0.37$ ).

211 The total integral daily nitrogen uptake rate (nitrate + ammonium uptake rates) of phytoplankton  
 212 ranged from 46.4 to 443.5  $\text{mg N m}^{-2} \text{ d}^{-1}$  (~~mean  $\pm$  S.D. = 180.4  $\pm$  106.7  $\text{mg N m}^{-2} \text{ d}^{-1}$ )~~ in this study. For the  
 213 non-polynya and polynya regions, they ranged from 46.4 to 248.1  $\text{mg N m}^{-2} \text{ d}^{-1}$  (~~mean  $\pm$  S.D. = 121.6  $\pm$~~   
 214 ~~89.3  $\text{mg N m}^{-2} \text{ d}^{-1}$ )~~ and from 91.7 to 443.5  $\text{mg N m}^{-2} \text{ d}^{-1}$  (~~mean  $\pm$  S.D. = 209.8  $\pm$  107.3  $\text{mg N m}^{-2} \text{ d}^{-1}$ ),~~  
 215 respectively. In comparison, the total integral daily nitrogen uptake rate of small phytoplankton ranged  
 216 from 16.6 to 46.6  $\text{mg N m}^{-2} \text{ d}^{-1}$  (~~mean  $\pm$  S.D. = 32.5  $\pm$  13.2  $\text{mg N m}^{-2} \text{ d}^{-1}$ )~~ and from 17.6 to 122.0  $\text{mg N m}^{-2}$   
 217  $\text{d}^{-1}$  (~~mean  $\pm$  S.D. = 50.8  $\pm$  32.4  $\text{mg N m}^{-2} \text{ d}^{-1}$ )~~ for the non-polynya and polynya regions, respectively.  
 218 Small phytoplankton contributed 36.2 % ( $\text{S.D.} = \pm 23.0$  %) to the total integral daily nitrogen uptake rates  
 219 in the non-polynya region, whereas they contributed 23.5 % ( $\text{S.D.} = \pm 6.0$  %) for the polynya region. The  
 220 integral daily nitrogen uptake rates and contributions of small phytoplankton were not statistically  
 221 different between the non-polynya and polynya regions.

222

#### 223 4. Discussion and conclusion

224 The total daily carbon uptake rates of phytoplankton averaged for the non-polynya and polynya  
 225 regions were  $0.42 \text{ g C m}^{-2} \text{ d}^{-1}$  (~~S.D. = ± 0.30 g C m<sup>-2</sup> d<sup>-1</sup>~~) and  $0.84 \text{ g C m}^{-2} \text{ d}^{-1}$  (~~S.D. = ± 0.18 g C m<sup>-2</sup> d<sup>-1</sup>~~),  
 226 respectively in this study. According to the previous reports in the Amundsen Sea (Lee et al., 2012; Kim  
 227 et al., 2015), the total daily carbon uptake rates ranged from 0.2 to  $0.12 \text{ g C m}^{-2} \text{ d}^{-1}$  in the non-polynya  
 228 region. Our rate ( $0.42 \text{ g C m}^{-2} \text{ d}^{-1}$ ) in the non-polynya region is somewhat higher than those reported  
 229 previously but they are not significantly different (t-test,  $p = 0.77$ ). In comparison, our total daily carbon  
 230 uptake rate in the polynya region ( $0.84 \text{ g C m}^{-2} \text{ d}^{-1}$ ) is within the range between Lee et al. (2012;  $2.2 \text{ g C}$   
 231  $\text{m}^{-2} \text{ d}^{-1}$ ) and Kim et al. (2015;  $0.2 \text{ g C m}^{-2} \text{ d}^{-1}$ ). The carbon uptake rates of phytoplankton in Lee et al.  
 232 (2012) and Kim et al. (2015) were measured during December 21, 2010-January 23, 2011 and February  
 233 11 to March 14, 2012, respectively. Our measurements in this study were executed mainly during January  
 234 1-15, 2014. For the Amundsen polynya region, a large seasonal variation in the total daily carbon uptake  
 235 rate of phytoplankton was already reported by Kim et al. (2015) and Arrigo et al. (2012) based on filed-  
 236 measured data and satellite-derived approach, respectively. It is appeared that this seasonal variation  
 237 largely depends on the bloom stage of phytoplankton which peaks during the late December-January and  
 238 terminates at late February (Arrigo and van Dijken 2003; Arrigo et al., 2012; Kim et al., 2015). ~~The~~  
 239 ~~carbon uptake rates of phytoplankton in Lee et al. (2012) and Kim et al. (2015) were measured during~~  
 240 ~~December 21 January 23, 2010 and February 11 to March 14, 2012, respectively. Our measurements in~~  
 241 ~~this study were executed mainly during January 1-15, 2014.~~

242 The total daily nitrogen uptake rates of phytoplankton were  $0.12 \text{ g N m}^{-2} \text{ d}^{-1}$  (~~S.D. = ± 0.09 g N m<sup>-2</sup>~~  
 243  $\text{d}^{-1}$ ) and  $0.21 \text{ g N m}^{-2} \text{ d}^{-1}$  (~~S.D. = ± 0.11 g N m<sup>-2</sup> d<sup>-1</sup>~~) for non-polynya and polynya regions, respectively  
 244 in this study. Previous studies reported that the total daily nitrogen uptake rates in non-polynya region  
 245 were  $0.24 \text{ g N m}^{-2} \text{ d}^{-1}$  during Dec. 21, 2010-Jan. 23, 2011~~in 2010/2011~~ and  $0.04 \text{ g N m}^{-2} \text{ d}^{-1}$  during Feb. 11  
 246 to Mar. 14, 2012~~in 2012~~, whereas the uptake rates in polynya region were  $0.93 \text{ g N m}^{-2} \text{ d}^{-1}$  in 2010/2011  
 247 and  $0.06 \text{ g N m}^{-2} \text{ d}^{-1}$  in 2012 in the Amundsen Sea (Lee et al., 2012; Kim et al., 2015). Our total daily  
 248 nitrogen uptake rates of phytoplankton in non-polynya and polynya regions were between the two

서식 있음: 위 첨자/아래 첨자없음

249 previous studies (Lee et al., 2012; Kim et al., 2015). Based on the nitrate and ammonium uptake rates in  
250 this study, *f*-ratios (nitrate uptake rate/nitrate+ammonium uptake rates) averaged for non-polynya and  
251 polynya regions were 0.62 (~~S.D. = ± 0.08~~) and 0.54 (~~S.D. = ± 0.20~~), respectively. These ratios also were  
252 between the two previous studies. Although they were not significant different because of a large spatial  
253 variation, larger *f*-ratios in non-polynya than in polynya region are consistent with the results of the  
254 previous studies (Lee et al., 2012; Kim et al., 2015). At this point, we do not have a solid explanation for  
255 that but a further future study is needed for the higher *f*-ratio mechanism in non-polynya region.

256 The percent contributions of small phytoplankton in terms of chlorophyll-a, POC/PON, daily  
257 carbon and nitrogen uptake rates are shown in Table 1. The overall contribution of small phytoplankton to  
258 the total chlorophyll-a concentration for all the productivity stations was 19.4 % (~~S.D. = ± 26.0 %~~) which  
259 is significantly (t-test,  $p < 0.05$ ) lower than the POC contribution ( $41.1 \pm 10.6 \%$ ). This is consistent with  
260 the result in the Chukchi Sea, Arctic Ocean reported by Lee et al. (2013). They explained that higher POC  
261 content per chlorophyll-a unit of small phytoplankton could cause their higher POC contribution (Lee et  
262 al., 2013). Given C/N ratio (~~mean ± S.D. =  $6.6 \pm 0.6$~~ ) and  $\delta^{13}\text{C}$  (~~mean ± S.D. =  $-25.9 \pm 1.0 \text{‰}$~~ ) of sample  
263 filters attained for POC and PON in this study, our filtered samples are believed to be mainly  
264 phytoplankton-originated POC and PON (Kim et al., 2016). Thus, a significant potential overestimated  
265 POC contribution of non-phytoplankton materials could be excluded for the higher POC contribution than  
266 chlorophyll-a contribution of small phytoplankton. Therefore, small phytoplankton contributions based on  
267 conventional assessments of chlorophyll-a concentration might lead an underestimated contribution of  
268 small phytoplankton (Lee et al., 2013). In fact, several authors argued that chlorophyll-a concentration  
269 might be not a good index for phytoplankton biomass since it largely depends on environmental factors  
270 such as nutrient and light conditions as well as dominant groups and physiological status of  
271 phytoplankton (Desortová 1981; Behrenfeld et al., 2005; Kruskopf and Flynn, 2006; Behrenfeld and Boss  
272 2006). However, the effects of non-phytoplankton carbon materials such as extracellular carbon mucilage  
273 can not be completely excluded for the POC contribution as discussed below.

서식 있음: 글꼴: 기울임꼴 없음

274 The overall contributions of carbon and nitrogen (nitrate and ammonium) uptake rates of small  
275 phytoplankton at all the productivity stations in this study are similar with 26.9 % and 27.7 %,  
276 respectively. These contributions are relatively higher than the chlorophyll-a contribution of small  
277 phytoplankton but they are not statistically different (t-test,  $p > 0.05$ ). In general, the contribution of daily  
278 ammonium uptake rate of small phytoplankton ~~are~~ is significantly (t-test,  $p < 0.05$ ) higher than the  
279 contribution of daily nitrate uptake rate of small phytoplankton at all the stations in this study. It is well-  
280 known for the ammonium preference of small phytoplankton in various regions (Koike et al., 1986;  
281 Tremblay et al., 2000, Lee et al., 2008; Lee et al., 2013).

282 In terms of the contributions in different regions, all the contributions (~~C~~chlorophyll-a, POC/PON,  
283 carbon and nitrogen uptake rates) of small phytoplankton were higher in the non-polynya region than in  
284 the polynya region (Table 1). In addition, the chlorophyll-a contribution of small phytoplankton (~~mean  $\pm$~~   
285 ~~S.D. =~~  $7.9 \pm 3.5$  %) was significantly (t-test,  $p < 0.01$ ) lower than the POC contribution (~~mean  $\pm$~~   
286 ~~S.D. =~~  $36.9 \pm 4.6$  %) in the polynya region, whereas they were not statistically different in the non-polynya  
287 region (Table 1). This indicates that small phytoplankton contributed more to the total POC than the  
288 chlorophyll-a concentration in the polynya region. We do not have species compositions of phytoplankton  
289 in this study, but previous results reported that *Phaeocystis* sp. are dominant in the Amundsen Sea  
290 polynya region ~~whereas diatoms are relatively dominant in the non-polynya regions~~ (Lee et al., 2012).  
291 Generally, *Phaeocystis* spp. release a large portion (up to 46 %) of extracellular carbon mucilage which  
292 makes their colonial form (Matrai et al., 1995). This non-phytoplankton carbon material without  
293 chlorophyll-a might cause a higher POC contribution of small phytoplankton in the polynya region during  
294 this study. In fact, the contribution of the daily carbon uptake rates of small phytoplankton ( $14.9 \pm 8.4$  %)  
295 was not as high as the POC contribution ( $36.9 \pm 4.6$  %) in the polynya region. The chlorophyll-a  
296 contributions of small phytoplankton were lower than ~~that~~ those of the daily carbon uptake rate in this  
297 study, which is consistent with the results from polynya and marginal ice zone stations in the Ross Sea,  
298 Antarctica during austral spring and summer (Saggiomo et al., 1998). They reported that the chlorophyll-a  
299 and primary production contributions of pico-phytoplankton ( $< 2 \mu\text{m}$ ) were 29 % and 40 % at polynya

300 stations whereas the contributions were 17 % and 32 % at marginal ice zone stations, respectively. In the  
 301 polynya region, they found much higher contributions in chlorophyll-a and primary production of small  
 302 phytoplankton than those in this study although their size of small phytoplankton is somewhat smaller  
 303 than our size (< 5 µm).

304 We found a strong negative correlation ( $r^2 = 0.790$ ,  $p < 0.05$ ) between the productivity  
 305 contributions of small phytoplankton and total daily carbon uptake rates of phytoplankton in the  
 306 Amundsen Sea (Fig. 7), which implies that daily primary production decreases as small phytoplankton  
 307 contribution increases. This is mainly because of the relatively lower carbon uptake rate of small  
 308 phytoplankton than large phytoplankton in the Chukchi Sea, Arctic Ocean reported by Lee et al. (2013).

309 ~~Moline et al. (2004) suggested that further warming air temperatures will increase inputs of glacial~~  
 310 ~~melting water and subsequently increase the contributions of small phytoplankton over large~~  
 311 ~~phytoplankton community (Moline et al. 2004). If these small phytoplankton were dominant under~~  
 312 ~~ongoing more melting conditions of glaciers, a potential increasing contribution of small phytoplankton~~  
 313 ~~might cause a subsequent decrease in the total primary production of phytoplankton in the Amundsen Sea~~  
 314 ~~based on this study in Figure 7.~~

315 In respect to food quality of small phytoplankton as a basic food source to herbivores,  
 316 macromolecular compositions such as proteins, lipids, and carbohydrates as photosynthetic-end products  
 317 will be needed for better understanding ~~alterations of small cells-dominant~~ marine ecosystem in response  
 318 to ~~ongoing~~ environmental changes (Lee et al., 2013). According to Kang et al. (accepted), small  
 319 phytoplankton— assimilate more food materials and calorific contents per unit of chlorophyll-a  
 320 concentration and thus provide more contributions in respect to energy aspect than other phytoplankton  
 321 community in the East/Japan Sea. However, ~~this change in dominant phytoplankton community from~~  
 322 ~~large to small cells will likely cause further alteration of higher trophic levels and subsequent food web~~  
 323 ~~(Moline et al., 2004):- A good example for food web alteration due to a shift in phytoplankton community~~  
 324 ~~composition from large diatoms to small cryptophytes is a shift in the spatial distribution of Antarctic krill~~  
 325 ~~since they do not feed efficiently on small cryptophytes (Moline et al., 2004).~~ In conclusion, monitoring

서식 있음: 들여쓰기: 첫 줄: 1.27 cm

326 the contributions of small-sized phytoplankton to total biomass and primary production of total  
327 phytoplankton community could be important as a valuable indicator to sense future changes in marine  
328 ecosystem under ongoing various climate-associated environmental changes. Moreover, further detailed  
329 studies for macromolecular compositions of small phytoplankton will be necessary for the anticipating  
330 small-dominant ecosystem under warming oceans.

331

### 332 **Acknowledgments**

333 We thank the captain and crew members of the Korean Research Icebreaker, *Araon*, for their  
334 outstanding assistance during the cruise. This research was supported by the Korea Polar Research  
335 Institute (KOPRI; PP15020).

336

337 **5. References**

- 338 Arrigo, K. R., Lowry, K. E. and van Dijken, G. L.: Annual changes in sea ice and phytoplankton in  
339 polynyas of the Amundsen Sea, Antarctica, *Deep-Sea Res. Pt. II*, 71, 5-15, 2012.
- 340 Arrigo, K. R. and van Dijken, G. L.: Continued increases in Arctic Ocean primary production, *Prog.*  
341 *Oceanogr.*, 136, 60-70, 2015.
- 342 Arrigo, K. R. and Van Dijken, G. L.: Phytoplankton dynamics within 37 Antarctic coastal polynya  
343 systems, *J. Geophys. Res.*, 108, NO. C8, 3271, doi:10.1029/2002JC001739, 2003.
- 344 Behrenfeld, M. J. and Boss, E.: Beam attenuation and chlorophyll concentration as alternative optical  
345 indices of phytoplankton biomass, *J. Mar. Res.*, 64, 431-451, 2006.
- 346 Behrenfeld, M. J., Boss, E., Siegel, D. A. and Shea, D. M.: Carbon-based ocean productivity and  
347 phytoplankton physiology from space, *Global Biogeochem. Cycles*, 19, 2005.
- 348 Desortová, B.: Relationship between chlorophyll-a concentration and phytoplankton biomass in several  
349 reservoirs in Czechoslovakia, *Internationale Revue der gesamten Hydrobiologie und*  
350 *Hydrographie*, 66, 153-169, 1981.
- 351 Ducklow, H. W., Baker, K., Martinson, D. G., Quetin, L. B., Ross, R. M., Smith, R. C., Stammerjohn, S.  
352 E., Vernet, M. and Fraser, W.: Marine pelagic ecosystems: the west Antarctic Peninsula, *Philos.*  
353 *Trans. R. Soc. Lond. B. Biol. Sci.*, 362, 67-94, 2007.
- 354 Joughin, I., Smith, B. E. and Medley, B.: Marine ice sheet collapse potentially under way for the Thwaites  
355 Glacier Basin, West Antarctica, *Science*, 344, 735-738, 2014.
- 356 Kim, B. K., Joo, H., Song, H. J., Yang, E. J., Lee, S. H., Hahm, D., Rhee, T. S. and Lee, S. H.: Large  
357 seasonal variation in phytoplankton production in the Amundsen Sea, *Polar Biol.*, 38, 319-331,  
358 2015.
- 359 Kim, B. K., Lee, J. H., Joo, H., Song, H. J., Yang, E. J., Lee, S. H. and Lee, S. H.: Macromolecular  
360 compositions of phytoplankton in the Amundsen Sea, Antarctica, *Deep-Sea Res. Pt. II*, 123, 42-49,  
361 2016.
- 362

- 363 Koike, I., Holm-Hansen, O. and Biggs, D. C.: Inorganic nitrogen metabolism by Antarctic phytoplankton  
364 with special reference to ammonium cycling, *Mar. Ecol. Prog. Ser.*, 30, 105-116, 1986.
- 365 Kruskopf, M. and Flynn, K. J.: Chlorophyll content and fluorescence responses cannot be used to gauge  
366 reliably phytoplankton biomass, nutrient status or growth rate, *New Phytol.*, 169, 525-536, 2006.
- 367 Lee, S. H., Whitley, T. E. and Kang, S.: Spring time production of bottom ice algae in the landfast sea  
368 ice zone at Barrow, Alaska, *J. Exp. Mar. Biol.*, 367, 204-212, 2008.
- 369 Lee, S. H., Kim, B. K., Yun, M. S., Joo, H., Yang, E. J., Kim, Y. N., Shin, H. C. and Lee, S.: Spatial  
370 distribution of phytoplankton productivity in the Amundsen Sea, Antarctica, *Polar Biol.*, 35, 1721-  
371 1733, 2012.
- 372 Lee, S. H., Yun, M. S., Kim, B. K., Joo, H., Kang, S.-J., Kang, C. K., Whitley, T. E.: Contribution of  
373 small phytoplankton to total primary production in the Chukchi Sea. *Cont. Shelf Res.*, 68, 43-50,  
374 2013.
- 375 Li, W. K., McLaughlin, F. A., Lovejoy, C. and Carmack, E. C.: Smallest algae thrive as the Arctic Ocean  
376 freshens, *Science*, 326, 539, 2009.
- 377 Matrai, P., Vernet, M., Hood, R., Jennings, A., Brody, E. and Saemundsdóttir, S.: Light-dependence of  
378 carbon and sulfur production by polar clones of the genus *Phaeocystis*, *Mar. Biol.*, 124, 157-167,  
379 1995.
- 380 Moline, M. A., Claustre, H., Frazer, T. K., Schofield, O. and Vernet, M.: Alteration of the food web along  
381 the Antarctic Peninsula in response to a regional warming trend, *Global Change Biol.*, 10, 1973-  
382 1980, 2004.
- 383 Montes-Hugo, M., Doney, S. C., Ducklow, H. W., Fraser, W., Martinson, D., Stammerjohn, S. E. and  
384 Schofield, O.: Recent changes in phytoplankton communities associated with rapid regional  
385 climate change along the western Antarctic Peninsula, *Science*, 323, 1470-1473, 2009.
- 386 Morán, X. A. G., LÓPEZ-URRUTIA, Á., CALVO-DÍAZ, A. and Li, W. K.: Increasing importance of  
387 small phytoplankton in a warmer ocean, *Global Change Biol.*, 16, 1137-1144, 2010.



388 Paolo, F. S., Fricker, H. A. and Padman, L.: Ice sheets. Volume loss from Antarctic ice shelves is  
389 accelerating, *Science*, 348, 327-331, 2015.

390 ~~Rückamp, M., Braun, M., Suckro, S. and Blindow, N.: Observed glacial changes on the King George  
391 Island ice cap, Antarctica, in the last decade, *Global Planet. Change*, 79, 99-109, 2011.~~

392 Saggiomo, V., Carrada, G., Mangoni, O., d'Alcala, M. R. and Russo, A.: Spatial and temporal variability  
393 of size-fractionated biomass and primary production in the Ross Sea (Antarctica) during austral  
394 spring and summer, *J. Mar. Syst.*, 17, 115-127, 1998.

395 Schmidtko, S., Heywood, K. J., Thompson, A. F. and Aoki, S.: Multidecadal warming of Antarctic waters,  
396 *Science*, 346, 1227-1231, 2014.

397 Timothy, R. P., Yoshiaki, M. and Carol, M.: A manual of chemical and biological methods for seawater  
398 analysis, Pergamon Press, Inc, 395, 475-490, 1984.

399 Tremblay, J. É., Legendre, L., Klein, B. and Therriault, J.: Size-differential uptake of nitrogen and carbon  
400 in a marginal sea (Gulf of St. Lawrence, Canada): significance of diel periodicity and urea uptake,  
401 *Deep Sea Research Part II: Topical Studies in Oceanography*, 47, 489-518, 2000.

402 Wassmann, P., Duarte, C. M., Agusti, S. and Sejr, M. K.: Footprints of climate change in the Arctic  
403 marine ecosystem, *Global Change Biol.*, 17, 1235-1249, 2011.

404 Yager, P. L., Sherrell, L., Stammerjohn, S. E., Alderkamp, A., Schofield, O., Abrahamsen, E. P., Arrigo,  
405 K. R., Bertilsson, S., Garay, D. and Guerrero, R.: ASPIRE: the Amundsen Sea Polynya  
406 international research expedition, *Oceanography*, 25, 40-53, 2012.

407

408

409

410 **Table caption**

411 Table 1. Contributions (%) ~~of chlorophyll-a, POC, PON, and carbon and nitrogen uptake rates~~ of small  
412 phytoplankton in the Amundsen Sea. Contributions of chlorophyll-a, POC, PON, and carbon and nitrogen  
413 uptake rates were derived from water euphotic column-integrated values averaged from stations.

414

415 **Figure captions**

416 Fig. 1. Sampling locations in the Amundsen Sea. Red closed circles represent productivity stations. Sea  
417 ice concentration data during the cruise period from Nimbus-7 SMMR and DMSP SSM/I-  
418 SSMIS Passive Microwave data provided by National Snow & Ice Data Center.

419 Fig. 2. Water column-integrated chlorophyll-a concentration at the productivity stations in the Amundsen  
420 Sea.

421 Fig. 3. Water column-integrated concentrations of POC and PON of small and large phytoplankton.

422 Fig. 4. Water column-integrated daily carbon uptake rates of small and large phytoplankton.

423 Fig. 5. Water column-integrated daily nitrate uptake rates of small and large phytoplankton.

424 Fig. 6. Water column-integrated daily ammonium uptake rates of small and large phytoplankton.

425 Fig. 7. Relationship between productivity contributions of small phytoplankton and the total daily carbon  
426 uptake rates of phytoplankton (large + small). The total daily carbon uptake rates were  
427 transformed into natural logs for a linear regression.

428

429

430

Table 1. Contributions (%) of small phytoplankton in the Amundsen Sea. Contributions of chlorophyll-a, POC, PON, and carbon and nitrogen uptake rates were derived from water euphotic column-integrated values averaged from stations.

서식 있음: 글꼴: 12 pt

|                     | Chlorophyll-a | POC         | PON         | Daily carbon uptake rate | Daily nitrate uptake rate | Daily ammonium uptake rate | Total nitrogen uptake rate |
|---------------------|---------------|-------------|-------------|--------------------------|---------------------------|----------------------------|----------------------------|
| <b>All stations</b> | 19.4 ± 26.0   | 41.1 ± 10.6 | 41.3 ± 11.5 | 26.9 ± 29.3              | 21.5 ± 11.1               | 38.7 ± 24.9                | 27.7 ± 14.4                |
| <b>Non-polynya</b>  | 42.4 ± 37.2   | 49.5 ± 14.4 | 50.0 ± 15.1 | 50.8 ± 42.8              | 28.2 ± 15.9               | 52.8 ± 40.5                | 36.2 ± 23.0                |
| <b>Polynya</b>      | 7.9 ± 3.5     | 36.9 ± 4.6  | 37.0 ± 6.9  | 14.9 ± 8.4               | 18.1 ± 6.8                | 31.6 ± 10.1                | 23.5 ± 6.0                 |

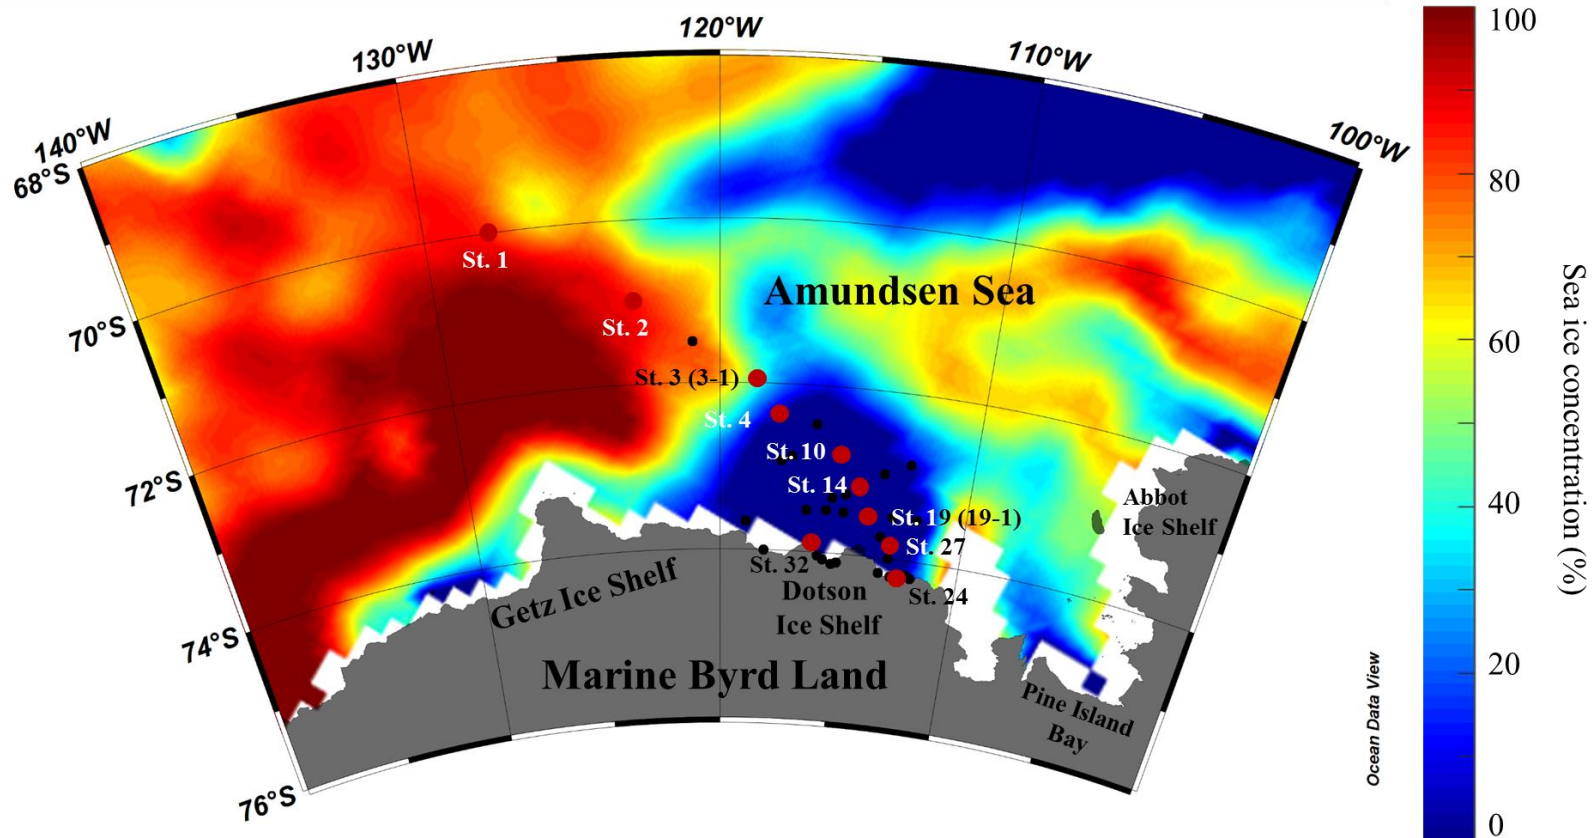

Fig. 1. Sampling locations in the Amundsen Sea. Red closed circles represent productivity stations. Sea ice concentration data during the cruise period from Nimbus-7 SMMR and DMSP SSM/I-SSMIS Passive Microwave data provided by National Snow & Ice Data Center.

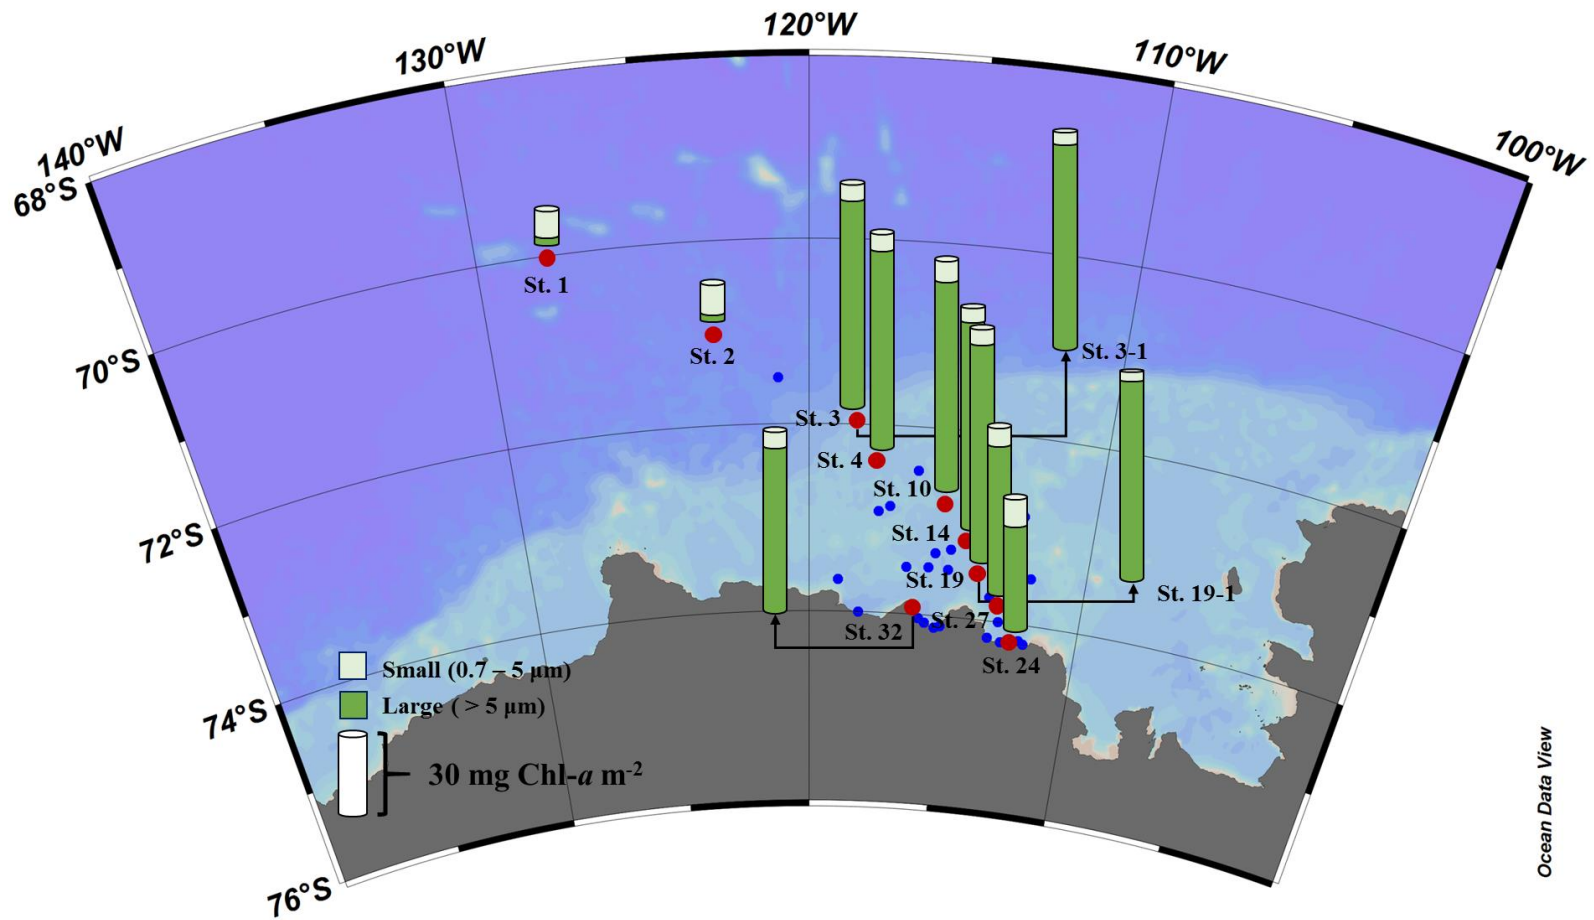

Fig. 2. Water column-integrated chlorophyll-a concentration at the productivity stations in the Amundsen Sea.

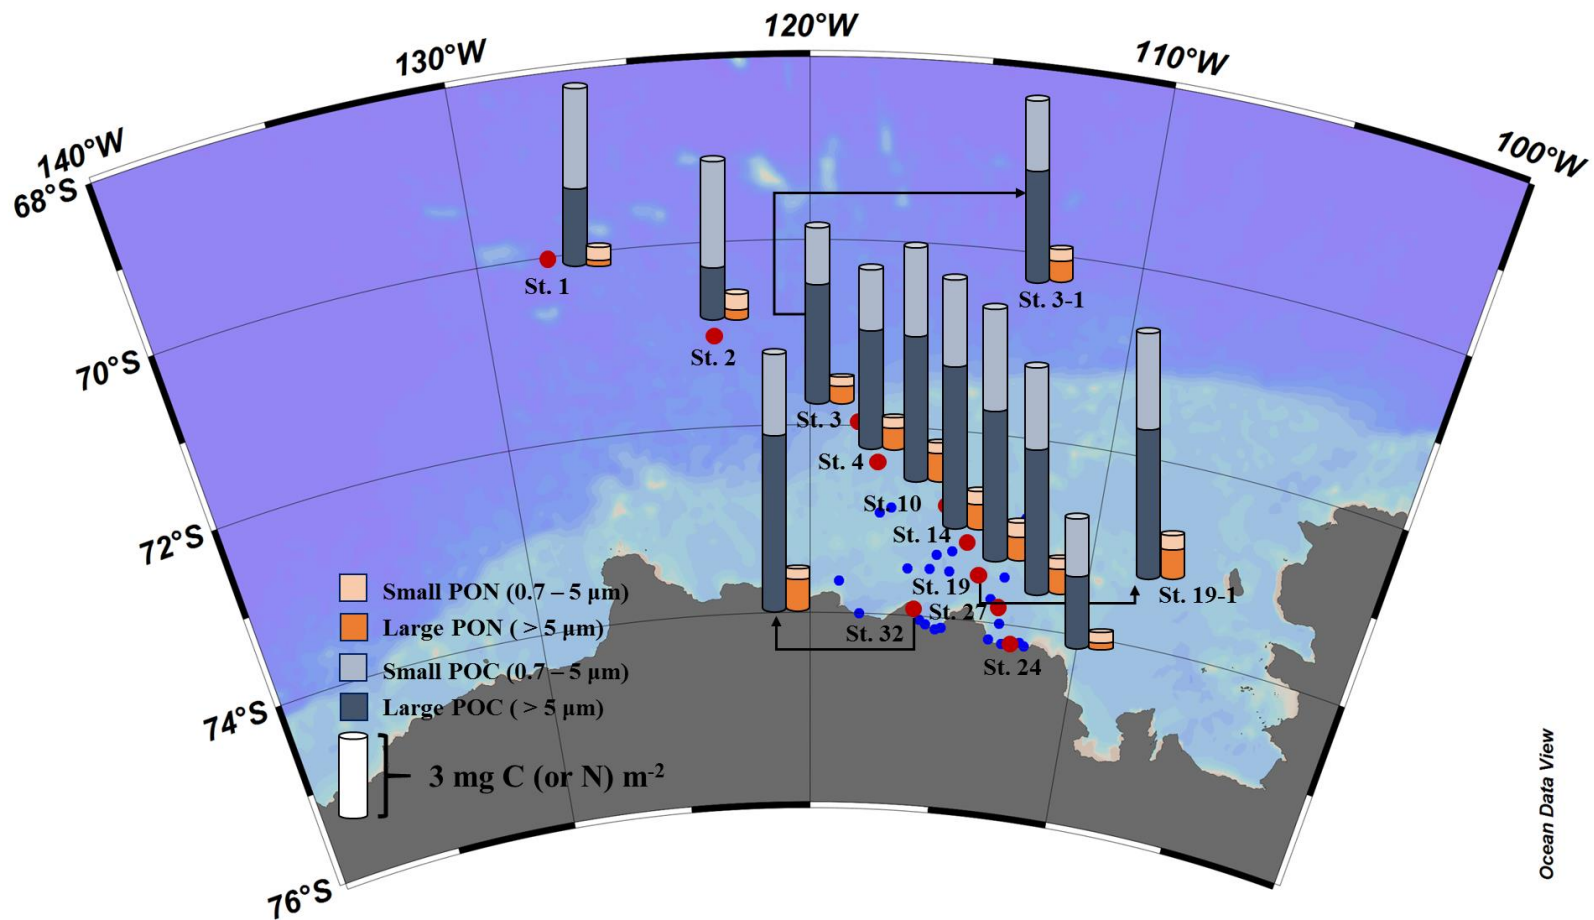

Ocean Data View

Fig. 3. Water column-integrated concentrations of POC and PON of small and large phytoplankton.

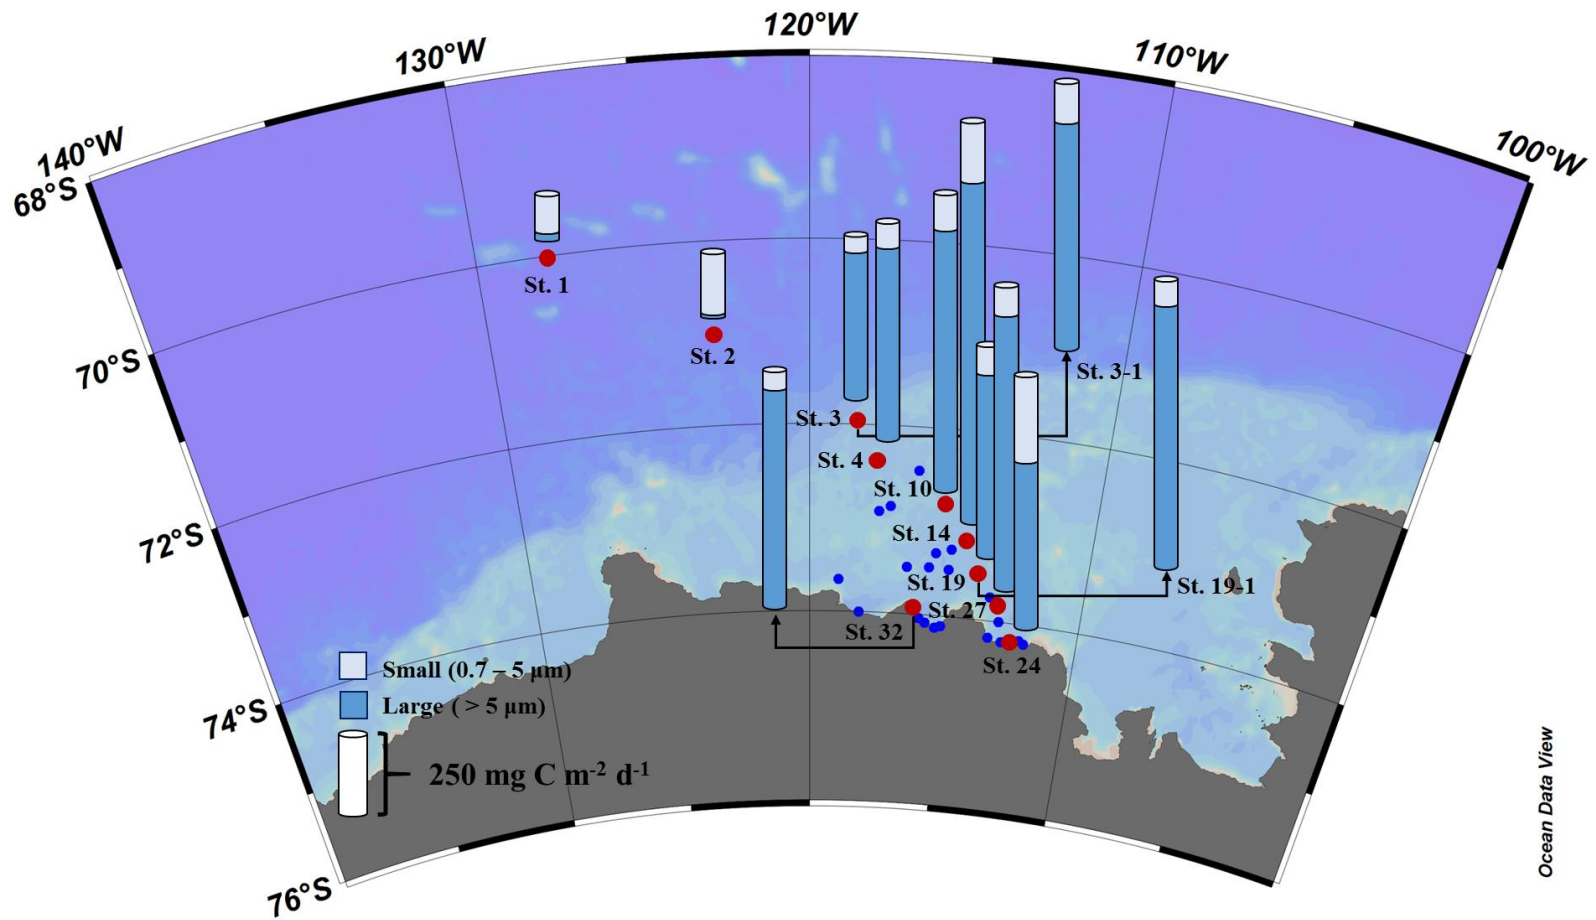

Fig. 4. Water column-integrated daily carbon uptake rates of small and large phytoplankton.



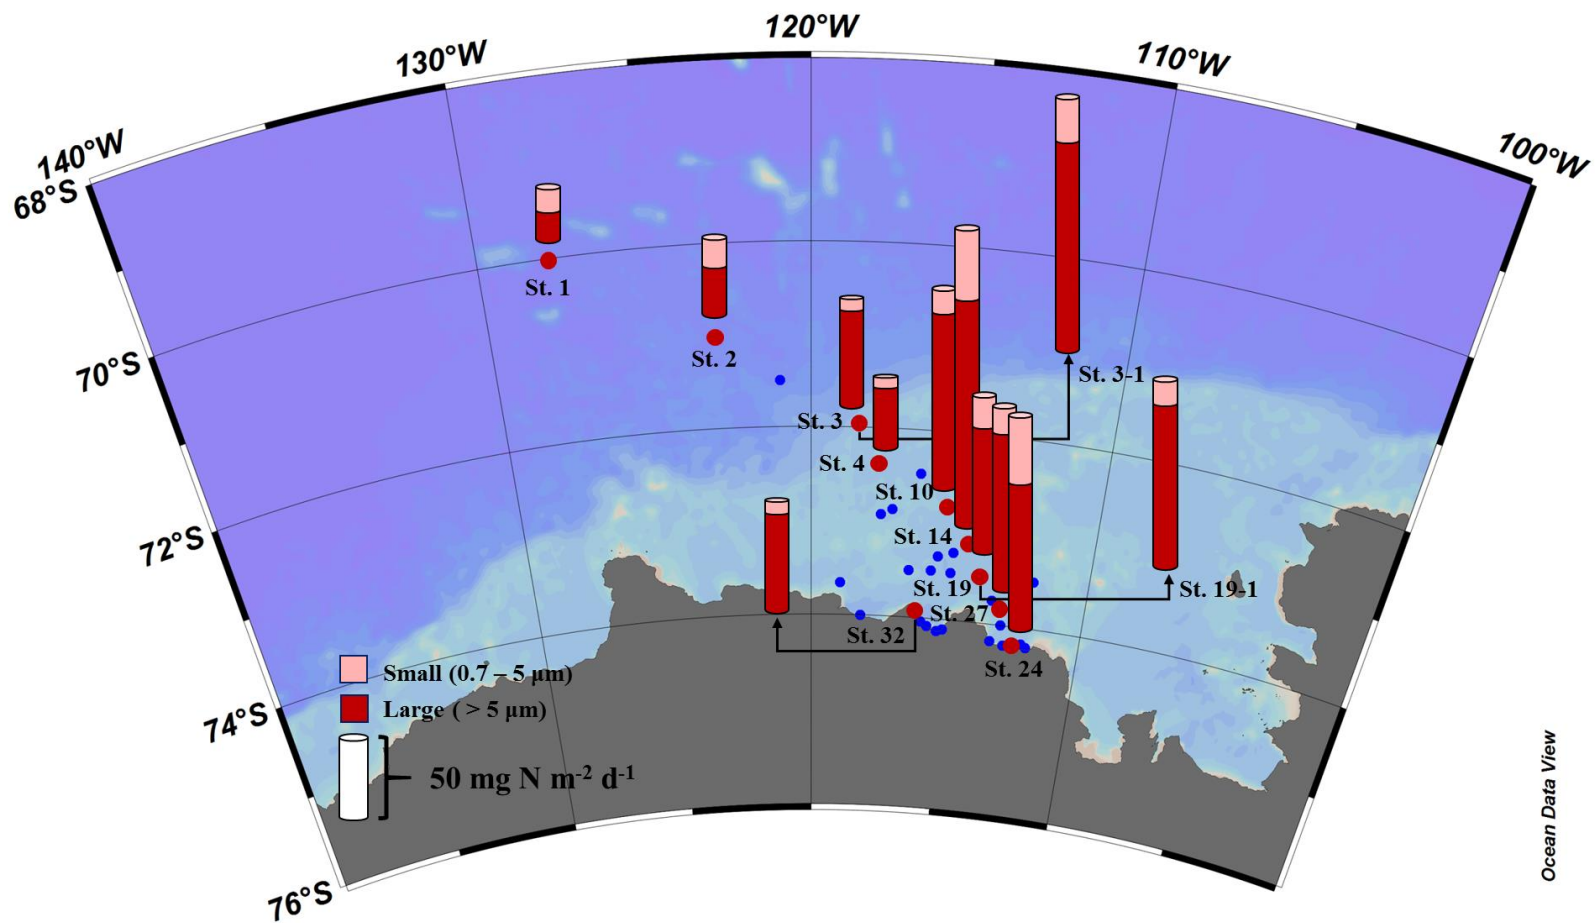

Fig. 5. Water column-integrated daily nitrate uptake rates of small and large phytoplankton.

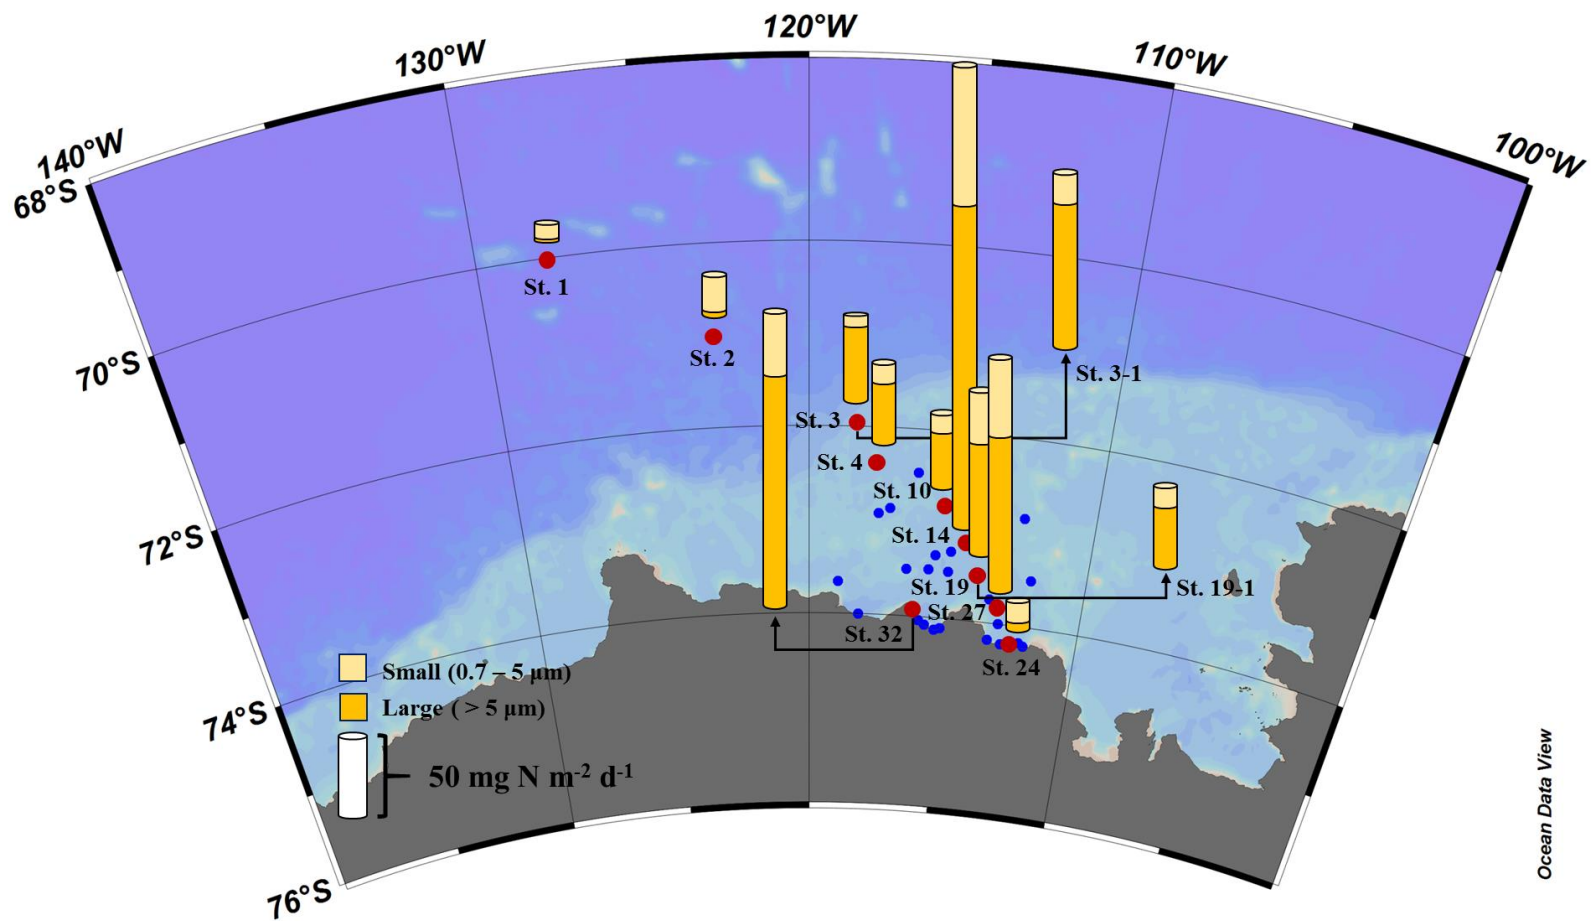

Fig. 6. Water column-integrated daily ammonium uptake rates of small and large phytoplankton.

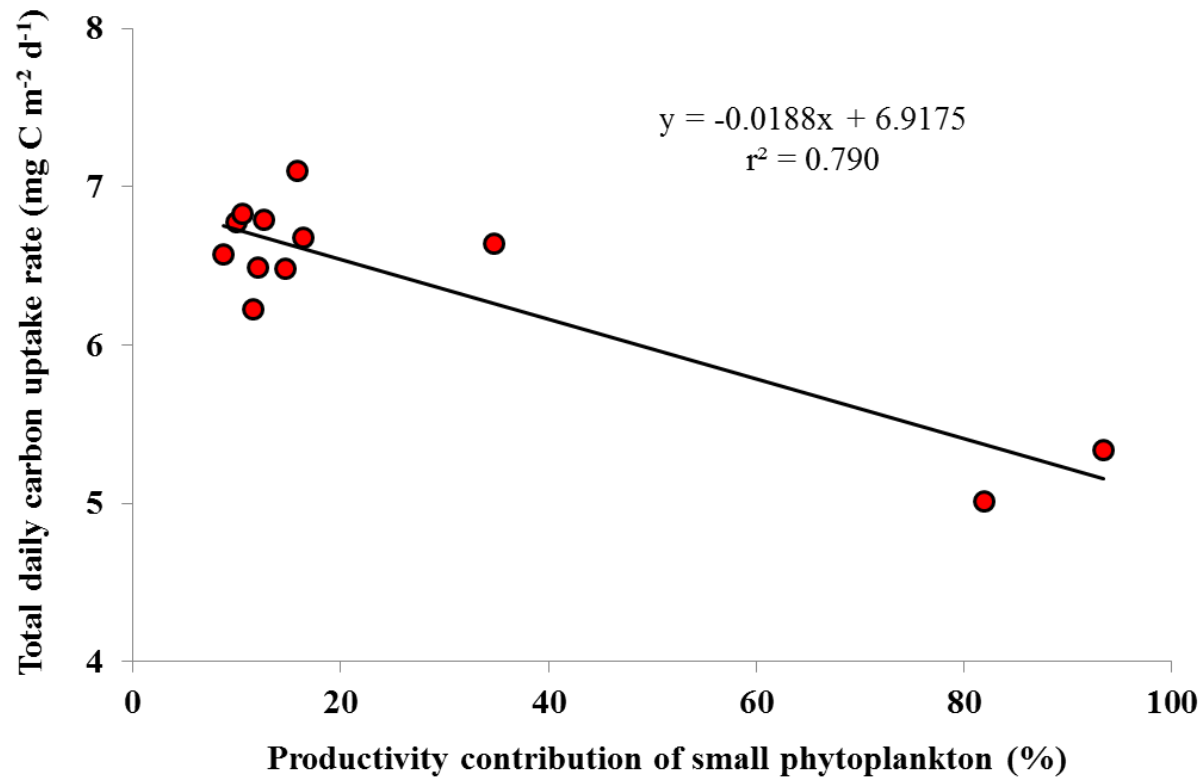

Fig. 7. Relationship between productivity contributions of small phytoplankton and the total daily carbon uptake rates of phytoplankton (large + small). The total daily carbon uptake rates were transformed into natural logs for a linear regression.
